# Supplementary material for: Full-Density Fused Deposition Modeling Dimensional Error as a Function of Raster Angle and Build Orientation: Large Dataset for Eleven Materials
Source: Preprints.org preprint supplement (doi:10.20944/preprints201812.0148.v1), 2018-12-12
Supplement: Supplementary file 1 [file Dimensional Accuracy Study Dataset - Raw Dataset.xlsx]

## Sheet: Sheet1
	FDM Dimensional Accuracy Study Dataset. To be used as supplimental materials for the manuscript "Full-Density Fused Deposition Modeling Dimensional Error as a Function of Raster Angle and Build Orientation: Large Dataset for Eleven Materials" by Messimer at al. This dataset of not be used or distributed without written permission from the authors.							Nominal Dimensions
								Z	3.25	mm
								C	63.5	mm
								E	12.7	mm
	Sample	Replication	Material		Factor 1	Factor 2		Responses
					Raster Angle (°)	Print Orientation		Z (mm)	C (mm)	E (mm)
	1	1	ABS		0	Flat		3.35	63.57	12.75
	2	2	ABS		0	Flat		3.38	63.41	12.76
	3	3	ABS		0	Flat		3.39	63.39	12.73
	4	4	ABS		0	Flat		3.49	63.48	12.75
	5	5	ABS		0	Flat		3.33	63.41	12.75
	6	6	ABS		0	Flat		3.28	63.43	12.76
	7	7	ABS		0	Flat		3.24	63.51	12.69
	8	8	ABS		0	Flat		3.21	63.52	12.69
	9	9	ABS		0	Flat		3.14	63.56	12.75
	10	10	ABS		0	Flat		3.2	63.34	12.63
	11	1	ABS		15	Flat		3.39	63.75	12.74
	12	2	ABS		15	Flat		3.47	63.62	12.77
	13	3	ABS		15	Flat		3.53	63.66	12.75
	14	4	ABS		15	Flat		3.48	63.79	12.77
	15	5	ABS		15	Flat		3.44	63.22	12.74
	16	6	ABS		15	Flat		3.26	63.33	12.71
	17	7	ABS		15	Flat		3.2	63.35	12.7
	18	8	ABS		15	Flat		3.3	63.3	12.74
	19	9	ABS		15	Flat		3.18	63.44	12.68
	20	10	ABS		15	Flat		3.25	63.33	12.61
	21	1	ABS		30	Flat		3.25	63.38	12.8
	22	2	ABS		30	Flat		3.43	63.4	12.67
	23	3	ABS		30	Flat		3.37	63.26	12.79
	24	4	ABS		30	Flat		3.44	63.32	12.81
	25	5	ABS		30	Flat		3.47	63.4	12.78
	26	6	ABS		30	Flat		3.17	63.51	12.73
	27	7	ABS		30	Flat		3.18	63.44	12.71
	28	8	ABS		30	Flat		3.16	63.44	12.65
	29	9	ABS		30	Flat		3.15	63.49	12.68
	30	10	ABS		30	Flat		3.14	63.58	12.71
	31	1	ABS		45	Flat		3.54	63.29	12.73
	32	2	ABS		45	Flat		3.23	63.47	12.76
	33	3	ABS		45	Flat		3.36	63.24	12.75
	34	4	ABS		45	Flat		3.42	63.24	12.77
	35	5	ABS		45	Flat		3.42	63.27	12.68
	36	6	ABS		45	Flat		3.28	63.26	12.7
	37	7	ABS		45	Flat		3.19	63.31	12.74
	38	8	ABS		45	Flat		3.14	63.52	12.76
	39	9	ABS		45	Flat		3.2	63.46	12.69
	40	10	ABS		45	Flat		3.16	63.34	12.65
	41	1	ABS		60	Flat		3.45	63.22	12.71
	42	2	ABS		60	Flat		3.41	63.2	12.7
	43	3	ABS		60	Flat		3.46	63.28	12.82
	44	4	ABS		60	Flat		3.42	63.19	12.71
	45	5	ABS		60	Flat		3.31	63.35	12.75
	46	6	ABS		60	Flat		3.25	63.31	12.62
	47	7	ABS		60	Flat		3.22	63.39	12.57
	48	8	ABS		60	Flat		3.26	63.29	12.72
	49	9	ABS		60	Flat		3.1	63.54	12.7
	50	10	ABS		60	Flat		3.16	63.29	12.78
	51	1	ABS		75	Flat		3.43	63.21	12.7
	52	2	ABS		75	Flat		3.36	63.2	12.72
	53	3	ABS		75	Flat		3.49	63.08	12.74
	54	4	ABS		75	Flat		3.41	63.18	12.73
	55	5	ABS		75	Flat		3.43	63.15	12.62
	56	6	ABS		75	Flat		3.27	63.54	12.74
	57	7	ABS		75	Flat		3.27	63.2	12.73
	58	8	ABS		75	Flat		3.22	63.21	12.52
	59	9	ABS		75	Flat		3.11	63.49	12.59
	60	10	ABS		75	Flat		3.18	63.31	12.58
	61	1	ABS		90	Flat		3.16	63.44	12.71
	62	2	ABS		90	Flat		3.36	63.21	12.72
	63	3	ABS		90	Flat		3.35	63.2	12.7
	64	4	ABS		90	Flat		3.58	63.2	12.69
	65	5	ABS		90	Flat		3.48	63.26	12.71
	66	6	ABS		90	Flat		3.26	63.48	12.71
	67	7	ABS		90	Flat		3.29	63.46	12.743
	68	8	ABS		90	Flat		3.24	63.3	12.65
	69	9	ABS		90	Flat		3.19	63.4	12.65
	70	10	ABS		90	Flat		3.18	63.47	12.6
	71	1	ABS		0	Horizontal		3.31	63.57	12.65
	72	2	ABS		0	Horizontal		3.3	63.45	12.7
	73	3	ABS		0	Horizontal		3.37	63.43	12.69
	74	4	ABS		0	Horizontal		3.25	63.44	12.67
	75	5	ABS		0	Horizontal		3.26	63.47	12.71
	76	6	ABS		0	Horizontal		3.26	63.51	12.58
	77	7	ABS		0	Horizontal		3.25	63.49	12.8
	78	8	ABS		0	Horizontal		3.24	63.51	12.75
	79	9	ABS		0	Horizontal		3.19	63.55	12.67
	80	10	ABS		0	Horizontal		3.25	63.48	12.69
	81	1	ABS		15	Horizontal		3.46	63.44	12.84
	82	2	ABS		15	Horizontal		3.44	63.43	12.86
	83	3	ABS		15	Horizontal		3.34	63.42	12.71
	84	4	ABS		15	Horizontal		3.35	63.49	12.84
	85	5	ABS		15	Horizontal		3.33	63.53	12.86
	86	6	ABS		15	Horizontal		3.25	63.51	12.89
	87	7	ABS		15	Horizontal		3.21	63.51	12.75
	88	8	ABS		15	Horizontal		3.24	63.46	12.7
	89	9	ABS		15	Horizontal		3.25	63.44	12.7
	90	10	ABS		15	Horizontal		3.32	63.4	12.75
	91	1	ABS		30	Horizontal		3.39	63.49	12.73
	92	2	ABS		30	Horizontal		3.48	63.55	12.68
	93	3	ABS		30	Horizontal		3.32	63.48	12.72
	94	4	ABS		30	Horizontal		3.36	63.41	12.73
	95	5	ABS		30	Horizontal		3.37	63.55	12.65
	96	6	ABS		30	Horizontal		3.23	63.5	12.76
	97	7	ABS		30	Horizontal		3.15	63.46	12.82
	98	8	ABS		30	Horizontal		3.25	63.54	12.74
	99	9	ABS		30	Horizontal		3.19	63.51	12.7
	100	10	ABS		30	Horizontal		3.13	63.46	12.67
	101	1	ABS		45	Horizontal		3.36	63.46	12.84
	102	2	ABS		45	Horizontal		3.34	63.47	12.72
	103	3	ABS		45	Horizontal		3.38	63.41	12.69
	104	4	ABS		45	Horizontal		3.45	63.36	12.74
	105	5	ABS		45	Horizontal		3.32	63.42	12.69
	106	6	ABS		45	Horizontal		3.23	63.51	12.87
	107	7	ABS		45	Horizontal		3.15	63.51	12.8
	108	8	ABS		45	Horizontal		3.16	63.46	12.68
	109	9	ABS		45	Horizontal		3.21	63.47	12.76
	110	10	ABS		45	Horizontal		3.26	63.47	12.81
	111	1	ABS		60	Horizontal		3.37	63.41	12.93
	112	2	ABS		60	Horizontal		3.31	63.4	12.72
	113	3	ABS		60	Horizontal		3.34	63.39	12.81
	114	4	ABS		60	Horizontal		3.48	63.41	12.82
	115	5	ABS		60	Horizontal		3.32	63.44	12.99
	116	6	ABS		60	Horizontal		3.23	63.48	12.72
	117	7	ABS		60	Horizontal		3.22	63.46	12.82
	118	8	ABS		60	Horizontal		3.12	63.47	12.85
	119	9	ABS		60	Horizontal		3.19	63.5	12.87
	120	10	ABS		60	Horizontal		3.21	63.41	12.85
	121	1	ABS		75	Horizontal		3.35	63.35	12.7
	122	2	ABS		75	Horizontal		3.25	63.34	12.78
	123	3	ABS		75	Horizontal		3.36	63.36	12.69
	124	4	ABS		75	Horizontal		3.24	63.39	12.74
	125	5	ABS		75	Horizontal		3.3	63.35	12.73
	126	6	ABS		75	Horizontal		3.27	63.42	12.78
	127	7	ABS		75	Horizontal		3.19	63.38	12.76
	128	8	ABS		75	Horizontal		3.25	63.48	12.76
	129	9	ABS		75	Horizontal		3.21	63.46	12.77
	130	10	ABS		75	Horizontal		3.11	63.41	12.86
	131	1	ABS		90	Horizontal		3.31	63.34	12.89
	132	2	ABS		90	Horizontal		3.31	63.39	12.72
	133	3	ABS		90	Horizontal		3.26	63.26	12.52
	134	4	ABS		90	Horizontal		3.21	63.44	12.74
	135	5	ABS		90	Horizontal		3.52	63.23	12.57
	136	6	ABS		90	Horizontal		3.16	63.49	12.67
	137	7	ABS		90	Horizontal		3.1	63.49	12.63
	138	8	ABS		90	Horizontal		3.16	63.43	12.69
	139	9	ABS		90	Horizontal		3.35	63.5	12.75
	140	10	ABS		90	Horizontal		3.22	63.42	12.72
	141	1	ABS		0	Vertical		3.33	63.33	12.77
	142	2	ABS		0	Vertical		3.33	63.27	12.72
	143	3	ABS		0	Vertical		3.33	63.33	12.813
	144	4	ABS		0	Vertical		3.26	63.71	12.743
	145	5	ABS		0	Vertical		3.28	63.56	12.71
	146	6	ABS		0	Vertical		3.21	63.53	12.73
	147	7	ABS		0	Vertical		3.19	63.51	12.71
	148	8	ABS		0	Vertical		3.13	63.49	12.7
	149	9	ABS		0	Vertical		3.14	63.54	12.69
	150	10	ABS		0	Vertical		3.15	63.52	12.68
	151	1	ABS		15	Vertical		3.33	63.5	12.79
	152	2	ABS		15	Vertical		3.35	63.6	12.78
	153	3	ABS		15	Vertical		3.36	63.52	12.74
	154	4	ABS		15	Vertical		3.33	63.33	12.79
	155	5	ABS		15	Vertical		3.31	63.67	12.81
	156	6	ABS		15	Vertical		3.18	63.52	12.69
	157	7	ABS		15	Vertical		3.2	63.57	12.7
	158	8	ABS		15	Vertical		3.23	63.48	12.73
	159	9	ABS		15	Vertical		3.18	63.55	12.72
	160	10	ABS		15	Vertical		3.22	63.47	12.68
	161	1	ABS		30	Vertical		3.28	63.58	12.76
	162	2	ABS		30	Vertical		3.31	63.31	12.72
	163	3	ABS		30	Vertical		3.25	63.59	12.76
	164	4	ABS		30	Vertical		3.28	63.48	12.75
	165	5	ABS		30	Vertical		3.28	63.71	12.78
	166	6	ABS		30	Vertical		3.22	63.4	12.7
	167	7	ABS		30	Vertical		3.21	63.47	12.7
	168	8	ABS		30	Vertical		3.2	63.49	12.73
	169	9	ABS		30	Vertical		3.33	63.55	12.8
	170	10	ABS		30	Vertical		3.35	63.63	12.77
	171	1	ABS		45	Vertical		3.32	63.56	12.73
	172	2	ABS		45	Vertical		3.28	63.56	12.73
	173	3	ABS		45	Vertical		3.3	63.32	12.69
	174	4	ABS		45	Vertical		3.27	63.52	12.73
	175	5	ABS		45	Vertical		3.28	63.3	12.74
	176	6	ABS		45	Vertical		3.27	63.52	12.71
	177	7	ABS		45	Vertical		3.26	63.49	12.66
	178	8	ABS		45	Vertical		3.1	63.51	12.64
	179	9	ABS		45	Vertical		3.25	63.51	12.58
	180	10	ABS		45	Vertical		3.27	63.5	12.77
	181	1	ABS		60	Vertical		3.37	63.77	12.69
	182	2	ABS		60	Vertical		3.25	63.28	12.77
	183	3	ABS		60	Vertical		3.35	63.66	12.69
	184	4	ABS		60	Vertical		3.3	63.72	12.71
	185	5	ABS		60	Vertical		3.35	63.65	12.7
	186	6	ABS		60	Vertical		3.23	63.55	12.61
	187	7	ABS		60	Vertical		3.21	63.55	12.64
	188	8	ABS		60	Vertical		3.19	63.42	12.71
	189	9	ABS		60	Vertical		3.22	63.45	12.74
	190	10	ABS		60	Vertical		3.36	63.42	12.71
	191	1	ABS		75	Vertical		3.33	63.27	12.68
	192	2	ABS		75	Vertical		3.25	63.77	12.71
	193	3	ABS		75	Vertical		3.26	63.73	12.7
	194	4	ABS		75	Vertical		3.39	63.75	12.79
	195	5	ABS		75	Vertical		3.24	63.6	12.7
	196	6	ABS		75	Vertical		3.18	63.6	12.62
	197	7	ABS		75	Vertical		3.16	63.49	12.6
	198	8	ABS		75	Vertical		3.23	63.35	12.7
	199	9	ABS		75	Vertical		3.15	63.5	12.65
	200	10	ABS		75	Vertical		3.22	63.43	12.74
	201	1	ABS		90	Vertical		3.4	63.67	12.76
	202	2	ABS		90	Vertical		3.51	63.67	12.73
	203	3	ABS		90	Vertical		3.32	63.66	12.76
	204	4	ABS		90	Vertical		3.32	63.8	12.72
	205	5	ABS		90	Vertical		3.33	63.72	12.73
	206	6	ABS		90	Vertical		3.21	63.35	12.7
	207	7	ABS		90	Vertical		3.18	63.61	12.67
	208	8	ABS		90	Vertical		3.25	63.47	12.72
	209	9	ABS		90	Vertical		3.34	63.51	12.74
	210	10	ABS		90	Vertical		3.33	63.47	12.75
	211	1	PLA		0	Flat		3.45	63.41	12.86
	212	2	PLA		0	Flat		3.44	63.35	12.69
	213	3	PLA		0	Flat		3.43	63.42	12.82
	214	4	PLA		0	Flat		3.43	63.44	12.68
	215	5	PLA		0	Flat		3.5	63.39	12.75
	216	6	PLA		0	Flat		3.19	63.49	12.7
	217	7	PLA		0	Flat		3.28	63.47	12.72
	218	8	PLA		0	Flat		3.15	63.41	12.68
	219	9	PLA		0	Flat		3.16	63.48	12.72
	220	10	PLA		0	Flat		3.22	63.46	12.77
	221	1	PLA		15	Flat		3.44	63.3	12.8
	222	2	PLA		15	Flat		3.47	63.33	12.68
	223	3	PLA		15	Flat		3.38	63.39	12.77
	224	4	PLA		15	Flat		3.42	63.37	12.79
	225	5	PLA		15	Flat		3.42	63.41	12.83
	226	6	PLA		15	Flat		3.17	63.43	12.63
	227	7	PLA		15	Flat		3.1	63.42	12.6
	228	8	PLA		15	Flat		3.19	63.38	12.68
	229	9	PLA		15	Flat		3.23	63.48	12.58
	230	10	PLA		15	Flat		3.13	63.44	12.7
	231	1	PLA		30	Flat		3.51	63.47	12.79
	232	2	PLA		30	Flat		3.47	63.47	12.71
	233	3	PLA		30	Flat		3.5	63.44	12.69
	234	4	PLA		30	Flat		3.45	63.55	12.73
	235	5	PLA		30	Flat		3.44	63.53	12.74
	236	6	PLA		30	Flat		3.17	63.5	12.69
	237	7	PLA		30	Flat		3.19	63.51	12.69
	238	8	PLA		30	Flat		3.25	63.56	12.72
	239	9	PLA		30	Flat		3.16	63.54	12.71
	240	10	PLA		30	Flat		3.09	63.51	12.59
	241	1	PLA		45	Flat		3.47	63.53	12.76
	242	2	PLA		45	Flat		3.42	63.52	12.68
	243	3	PLA		45	Flat		3.57	63.47	12.7
	244	4	PLA		45	Flat		3.37	63.51	12.7
	245	5	PLA		45	Flat		3.46	63.55	12.57
	246	6	PLA		45	Flat		3.24	63.45	12.62
	247	7	PLA		45	Flat		3.27	63.44	12.59
	248	8	PLA		45	Flat		3.17	63.5	12.72
	249	9	PLA		45	Flat		3.22	63.52	12.7
	250	10	PLA		45	Flat		3.22	63.51	12.7
	251	1	PLA		60	Flat		3.44	63.86	12.58
	252	2	PLA		60	Flat		3.53	63.58	12.56
	253	3	PLA		60	Flat		3.61	63.59	12.52
	254	4	PLA		60	Flat		3.42	63.61	12.65
	255	5	PLA		60	Flat		3.44	63.6	12.62
	256	6	PLA		60	Flat		3.29	63.55	12.65
	257	7	PLA		60	Flat		3.18	63.53	12.69
	258	8	PLA		60	Flat		3.27	63.52	12.69
	259	9	PLA		60	Flat		3.31	63.56	12.81
	260	10	PLA		60	Flat		3.25	63.63	12.7
	261	1	PLA		75	Flat		3.55	63.66	12.79
	262	2	PLA		75	Flat		3.42	63.7	12.68
	263	3	PLA		75	Flat		3.41	63.71	12.87
	264	4	PLA		75	Flat		3.37	63.67	12.72
	265	5	PLA		75	Flat		3.42	63.72	12.57
	266	6	PLA		75	Flat		3.3	63.53	12.63
	267	7	PLA		75	Flat		3.29	63.63	12.66
	268	8	PLA		75	Flat		3.32	63.56	12.62
	269	9	PLA		75	Flat		3.18	63.59	12.67
	270	10	PLA		75	Flat		3.25	63.63	12.7
	271	1	PLA		90	Flat		3.51	63.73	12.68
	272	2	PLA		90	Flat		3.41	63.76	12.7
	273	3	PLA		90	Flat		3.43	63.74	12.7
	274	4	PLA		90	Flat		3.51	63.79	12.81
	275	5	PLA		90	Flat		3.48	63.73	12.75
	276	6	PLA		90	Flat		3.25	63.68	12.61
	277	7	PLA		90	Flat		3.17	63.58	12.7
	278	8	PLA		90	Flat		3.28	63.73	12.71
	279	9	PLA		90	Flat		3.26	63.64	12.64
	280	10	PLA		90	Flat		3.22	63.79	12.7
	281	1	PLA		0	Horizontal		3.23	63.39	12.89
	282	2	PLA		0	Horizontal		3.27	63.57	12.72
	283	3	PLA		0	Horizontal		3.52	63.37	12.74
	284	4	PLA		0	Horizontal		3.29	63.51	12.55
	285	5	PLA		0	Horizontal		3.21	63.39	12.8
	286	6	PLA		0	Horizontal		3.22	63.43	12.74
	287	7	PLA		0	Horizontal		3.16	63.46	12.8
	288	8	PLA		0	Horizontal		3.21	63.44	12.6
	289	9	PLA		0	Horizontal		3.2	63.49	12.72
	290	10	PLA		0	Horizontal		3.22	63.48	12.74
	291	1	PLA		15	Horizontal		3.24	63.44	12.84
	292	2	PLA		15	Horizontal		3.48	63.34	13.09
	293	3	PLA		15	Horizontal		3.42	63.38	12.87
	294	4	PLA		15	Horizontal		3.48	63.43	12.87
	295	5	PLA		15	Horizontal		3.28	63.47	12.91
	296	6	PLA		15	Horizontal		3.21	63.51	12.75
	297	7	PLA		15	Horizontal		3.1	63.54	12.45
	298	8	PLA		15	Horizontal		3.25	63.48	12.85
	299	9	PLA		15	Horizontal		3.28	63.55	12.68
	300	10	PLA		15	Horizontal		3.33	63.51	12.69
	301	1	PLA		30	Horizontal		3.37	63.46	12.9
	302	2	PLA		30	Horizontal		3.35	63.52	12.68
	303	3	PLA		30	Horizontal		3.25	63.46	12.93
	304	4	PLA		30	Horizontal		3.31	63.52	12.81
	305	5	PLA		30	Horizontal		3.29	63.49	12.91
	306	6	PLA		30	Horizontal		3.19	63.52	12.57
	307	7	PLA		30	Horizontal		3.17	63.48	12.65
	308	8	PLA		30	Horizontal		3.12	63.5	12.7
	309	9	PLA		30	Horizontal		3.29	63.44	12.77
	310	10	PLA		30	Horizontal		3.28	63.57	12.67
	311	1	PLA		45	Horizontal		3.28	63.68	12.58
	312	2	PLA		45	Horizontal		3.47	63.66	12.82
	313	3	PLA		45	Horizontal		3.24	63.66	12.78
	314	4	PLA		45	Horizontal		3.29	63.68	12.29
	315	5	PLA		45	Horizontal		3.31	63.65	12.37
	316	6	PLA		45	Horizontal		3.2	63.54	12.72
	317	7	PLA		45	Horizontal		3.26	63.54	12.53
	318	8	PLA		45	Horizontal		3.19	63.52	12.89
	319	9	PLA		45	Horizontal		3.27	63.79	12.75
	320	10	PLA		45	Horizontal		3.25	63.58	12.73
	321	1	PLA		60	Horizontal		3.3	63.76	12.75
	322	2	PLA		60	Horizontal		3.21	63.59	12.89
	323	3	PLA		60	Horizontal		3.2	63.54	12.77
	324	4	PLA		60	Horizontal		3.16	63.47	12.85
	325	5	PLA		60	Horizontal		3.16	63.53	12.79
	326	6	PLA		60	Horizontal		3.23	63.52	12.72
	327	7	PLA		60	Horizontal		3.31	63.52	12.76
	328	8	PLA		60	Horizontal		3.33	63.48	12.7
	329	9	PLA		60	Horizontal		3.18	63.66	12.73
	330	10	PLA		60	Horizontal		3.22	63.54	12.73
	331	1	PLA		75	Horizontal		3.21	63.83	12.73
	332	2	PLA		75	Horizontal		3.26	63.77	12.79
	333	3	PLA		75	Horizontal		3.31	63.89	12.73
	334	4	PLA		75	Horizontal		3.25	63.9	12.81
	335	5	PLA		75	Horizontal		3.31	64.05	12.81
	336	6	PLA		75	Horizontal		3.25	63.52	12.68
	337	7	PLA		75	Horizontal		3.26	63.52	12.68
	338	8	PLA		75	Horizontal		3.24	63.6	12.65
	339	9	PLA		75	Horizontal		3.26	63.77	12.86
	340	10	PLA		75	Horizontal		3.24	63.73	12.67
	341	1	PLA		90	Horizontal		3.25	63.91	12.56
	342	2	PLA		90	Horizontal		3.29	63.78	12.81
	343	3	PLA		90	Horizontal		3.29	63.75	12.79
	344	4	PLA		90	Horizontal		3.27	64.06	12.68
	345	5	PLA		90	Horizontal		3.34	63.77	12.8
	346	6	PLA		90	Horizontal		3.17	63.64	12.7
	347	7	PLA		90	Horizontal		3.23	63.47	12.65
	348	8	PLA		90	Horizontal		3.16	63.44	12.65
	349	9	PLA		90	Horizontal		3.23	63.78	12.69
	350	10	PLA		90	Horizontal		3.28	63.74	12.69
	351	1	PLA		0	Vertical		3.39	63.91	12.84
	352	2	PLA		0	Vertical		3.33	63.89	12.75
	353	3	PLA		0	Vertical		3.33	63.94	12.88
	354	4	PLA		0	Vertical		3.48	63.91	12.91
	355	5	PLA		0	Vertical		3.33	63.88	12.74
	356	6	PLA		0	Vertical		3.18	63.73	12.78
	357	7	PLA		0	Vertical		3.19	63.71	12.65
	358	8	PLA		0	Vertical		3.17	63.84	12.65
	359	9	PLA		0	Vertical		3.25	63.83	12.69
	360	10	PLA		0	Vertical		3.27	63.85	12.77
	361	1	PLA		15	Vertical		3.32	63.9	12.91
	362	2	PLA		15	Vertical		3.3	63.84	12.86
	363	3	PLA		15	Vertical		3.44	63.74	12.91
	364	4	PLA		15	Vertical		3.33	63.75	12.92
	365	5	PLA		15	Vertical		3.29	63.81	12.83
	366	6	PLA		15	Vertical		3.21	63.51	12.66
	367	7	PLA		15	Vertical		3.18	63.79	12.71
	368	8	PLA		15	Vertical		3.22	63.39	12.56
	369	9	PLA		15	Vertical		3.26	63.76	12.72
	370	10	PLA		15	Vertical		3.27	63.82	12.71
	371	1	PLA		30	Vertical		3.32	63.92	12.79
	372	2	PLA		30	Vertical		3.36	63.87	12.76
	373	3	PLA		30	Vertical		3.3	63.89	12.69
	374	4	PLA		30	Vertical		3.31	63.95	12.78
	375	5	PLA		30	Vertical		3.32	63.91	12.75
	376	6	PLA		30	Vertical		3.22	63.76	12.73
	377	7	PLA		30	Vertical		3.16	63.84	12.65
	378	8	PLA		30	Vertical		3.24	63.8	12.75
	379	9	PLA		30	Vertical		3.22	63.71	12.7
	380	10	PLA		30	Vertical		3.24	63.81	12.86
	381	1	PLA		45	Vertical		3.35	63.69	12.9
	382	2	PLA		45	Vertical		3.32	63.86	12.72
	383	3	PLA		45	Vertical		3.31	63.8	12.94
	384	4	PLA		45	Vertical		3.23	63.86	12.75
	385	5	PLA		45	Vertical		3.28	63.87	12.98
	386	6	PLA		45	Vertical		3.24	63.49	12.76
	387	7	PLA		45	Vertical		3.16	63.41	12.7
	388	8	PLA		45	Vertical		3.2	63.81	12.87
	389	9	PLA		45	Vertical		3.21	63.87	12.77
	390	10	PLA		45	Vertical		3.17	63.8	12.72
	391	1	PLA		60	Vertical		3.33	63.73	12.79
	392	2	PLA		60	Vertical		3.32	63.87	12.86
	393	3	PLA		60	Vertical		3.3	63.89	12.79
	394	4	PLA		60	Vertical		3.46	63.83	12.93
	395	5	PLA		60	Vertical		3.24	63.79	12.68
	396	6	PLA		60	Vertical		3.24	63.54	12.73
	397	7	PLA		60	Vertical		3.25	63.55	12.59
	398	8	PLA		60	Vertical		3.16	63.46	12.7
	399	9	PLA		60	Vertical		3.18	63.82	12.76
	400	10	PLA		60	Vertical		3.23	63.9	12.75
	401	1	PLA		75	Vertical		3.38	63.91	12.87
	402	2	PLA		75	Vertical		3.31	63.85	12.91
	403	3	PLA		75	Vertical		3.25	63.88	12.83
	404	4	PLA		75	Vertical		3.37	63.85	12.88
	405	5	PLA		75	Vertical		3.32	63.84	12.89
	406	6	PLA		75	Vertical		3.26	63.71	12.7
	407	7	PLA		75	Vertical		3.21	63.72	12.64
	408	8	PLA		75	Vertical		3.23	63.67	12.65
	409	9	PLA		75	Vertical		3.23	63.84	12.77
	410	10	PLA		75	Vertical		3.23	63.82	12.83
	411	1	PLA		90	Vertical		3.42	63.84	12.89
	412	2	PLA		90	Vertical		3.25	63.81	12.82
	413	3	PLA		90	Vertical		3.21	63.73	12.91
	414	4	PLA		90	Vertical		3.27	63.87	12.92
	415	5	PLA		90	Vertical		3.23	63.8	12.72
	416	6	PLA		90	Vertical		3.23	63.73	12.61
	417	7	PLA		90	Vertical		3.24	63.72	12.82
	418	8	PLA		90	Vertical		3.2	63.76	12.87
	419	9	PLA		90	Vertical		3.25	63.84	12.79
	420	10	PLA		90	Vertical		3.19	63.82	12.69
	421	1	ALPLA		0	Flat		3.23	63.14	12.6
	422	2	ALPLA		0	Flat		3.24	63.25	12.66
	423	3	ALPLA		0	Flat		3.42	63.24	12.71
	424	4	ALPLA		0	Flat		3.24	63.15	12.61
	425	5	ALPLA		0	Flat		3.27	63.22	12.67
	426	6	ALPLA		0	Flat		3.16	63.32	12.79
	427	7	ALPLA		0	Flat		3.24	63.26	12.74
	428	8	ALPLA		0	Flat		3.23	63.21	12.72
	429	9	ALPLA		0	Flat		3.21	63.38	12.72
	430	10	ALPLA		0	Flat		3.25	63.49	12.75
	431	1	ALPLA		15	Flat		3.28	63.2	12.69
	432	2	ALPLA		15	Flat		3.29	63.25	12.7
	433	3	ALPLA		15	Flat		3.43	63.18	12.61
	434	4	ALPLA		15	Flat		3.28	63.28	12.64
	435	5	ALPLA		15	Flat		3.28	63.22	12.61
	436	6	ALPLA		15	Flat		3.18	63.34	12.88
	437	7	ALPLA		15	Flat		3.24	63.26	12.64
	438	8	ALPLA		15	Flat		3.22	63.45	12.79
	439	9	ALPLA		15	Flat		3.2	63.45	12.75
	440	10	ALPLA		15	Flat		3.19	63.37	12.76
	441	1	ALPLA		30	Flat		3.33	63.35	12.58
	442	2	ALPLA		30	Flat		3.67	63.34	12.6
	443	3	ALPLA		30	Flat		3.36	63.21	12.57
	444	4	ALPLA		30	Flat		3.32	63.25	12.69
	445	5	ALPLA		30	Flat		3.35	63.31	12.7
	446	6	ALPLA		30	Flat		3.24	63.31	12.68
	447	7	ALPLA		30	Flat		3.16	63.4	12.78
	448	8	ALPLA		30	Flat		3.22	63.29	12.71
	449	9	ALPLA		30	Flat		3.18	63.48	12.73
	450	10	ALPLA		30	Flat		3.18	63.45	12.8
	451	1	ALPLA		45	Flat		3.34	63.3	12.68
	452	2	ALPLA		45	Flat		3.35	63.55	12.58
	453	3	ALPLA		45	Flat		3.36	63.37	12.6
	454	4	ALPLA		45	Flat		3.35	63.42	12.53
	455	5	ALPLA		45	Flat		3.35	63.41	12.66
	456	6	ALPLA		45	Flat		3.24	63.51	12.86
	457	7	ALPLA		45	Flat		3.23	63.51	12.57
	458	8	ALPLA		45	Flat		3.18	63.58	12.64
	459	9	ALPLA		45	Flat		3.19	63.65	12.6
	460	10	ALPLA		45	Flat		3.24	63.53	12.68
	461	1	ALPLA		60	Flat		3.3	63.42	12.55
	462	2	ALPLA		60	Flat		3.32	63.48	12.65
	463	3	ALPLA		60	Flat		3.48	63.56	12.59
	464	4	ALPLA		60	Flat		3.4	63.49	12.62
	465	5	ALPLA		60	Flat		3.31	63.43	12.67
	466	6	ALPLA		60	Flat		3.19	63.52	12.79
	467	7	ALPLA		60	Flat		3.27	63.56	12.88
	468	8	ALPLA		60	Flat		3.2	63.68	12.64
	469	9	ALPLA		60	Flat		3.16	63.71	12.58
	470	10	ALPLA		60	Flat		3.22	63.7	12.62
	471	1	ALPLA		75	Flat		3.45	63.59	12.59
	472	2	ALPLA		75	Flat		3.33	63.56	12.56
	473	3	ALPLA		75	Flat		3.39	63.46	12.55
	474	4	ALPLA		75	Flat		3.42	63.63	12.64
	475	5	ALPLA		75	Flat		3.3	63.57	12.63
	476	6	ALPLA		75	Flat		3.23	63.56	12.82
	477	7	ALPLA		75	Flat		3.19	63.44	12.8
	478	8	ALPLA		75	Flat		3.24	63.59	12.71
	479	9	ALPLA		75	Flat		3.3	63.59	12.63
	480	10	ALPLA		75	Flat		3.15	63.59	12.63
	481	1	ALPLA		90	Flat		3.33	63.64	12.63
	482	2	ALPLA		90	Flat		3.33	63.64	12.55
	483	3	ALPLA		90	Flat		3.36	63.65	12.61
	484	4	ALPLA		90	Flat		3.32	63.68	12.61
	485	5	ALPLA		90	Flat		3.32	63.64	12.55
	486	6	ALPLA		90	Flat		3.23	63.41	12.79
	487	7	ALPLA		90	Flat		3.22	63.46	12.8
	488	8	ALPLA		90	Flat		3.18	63.52	12.75
	489	9	ALPLA		90	Flat		3.16	63.75	12.68
	490	10	ALPLA		90	Flat		3.22	63.81	12.59
	491	1	ALPLA		0	Horizontal		3.34	63.37	12.66
	492	2	ALPLA		0	Horizontal		3.31	63.33	12.67
	493	3	ALPLA		0	Horizontal		3.22	63.52	12.76
	494	4	ALPLA		0	Horizontal		3.23	63.4	12.76
	495	5	ALPLA		0	Horizontal		3.25	63.41	12.7
	496	6	ALPLA		0	Horizontal		3.24	63.43	12.64
	497	7	ALPLA		0	Horizontal		3.21	63.53	12.68
	498	8	ALPLA		0	Horizontal		3.23	63.41	12.84
	499	9	ALPLA		0	Horizontal		3.25	63.34	12.77
	500	10	ALPLA		0	Horizontal		3.24	63.38	12.73
	501	1	ALPLA		15	Horizontal		3.24	63.38	12.68
	502	2	ALPLA		15	Horizontal		3.32	63.41	12.79
	503	3	ALPLA		15	Horizontal		3.21	63.4	12.72
	504	4	ALPLA		15	Horizontal		3.24	63.39	12.7
	505	5	ALPLA		15	Horizontal		3.33	63.38	12.67
	506	6	ALPLA		15	Horizontal		3.23	63.44	12.65
	507	7	ALPLA		15	Horizontal		3.22	63.48	12.75
	508	8	ALPLA		15	Horizontal		3.29	63.45	12.76
	509	9	ALPLA		15	Horizontal		3.26	63.45	12.86
	510	10	ALPLA		15	Horizontal		3.29	63.5	12.69
	511	1	ALPLA		30	Horizontal		3.31	63.54	12.7
	512	2	ALPLA		30	Horizontal		3.27	63.46	12.71
	513	3	ALPLA		30	Horizontal		3.26	63.45	12.82
	514	4	ALPLA		30	Horizontal		3.21	63.57	12.67
	515	5	ALPLA		30	Horizontal		3.27	63.53	12.79
	516	6	ALPLA		30	Horizontal		3.2	63.56	12.85
	517	7	ALPLA		30	Horizontal		3.33	63.49	12.64
	518	8	ALPLA		30	Horizontal		3.25	63.48	12.85
	519	9	ALPLA		30	Horizontal		3.27	63.43	12.79
	520	10	ALPLA		30	Horizontal		3.24	63.55	12.66
	521	1	ALPLA		45	Horizontal		3.18	63.58	12.76
	522	2	ALPLA		45	Horizontal		3.24	63.58	12.83
	523	3	ALPLA		45	Horizontal		3.21	63.64	12.84
	524	4	ALPLA		45	Horizontal		3.13	63.53	12.53
	525	5	ALPLA		45	Horizontal		3.14	63.52	12.59
	526	6	ALPLA		45	Horizontal		3.16	63.52	12.88
	527	7	ALPLA		45	Horizontal		3.21	63.47	12.79
	528	8	ALPLA		45	Horizontal		3.23	63.58	12.72
	529	9	ALPLA		45	Horizontal		3.3	63.49	12.81
	530	10	ALPLA		45	Horizontal		3.27	63.61	12.71
	531	1	ALPLA		60	Horizontal		3.16	63.65	12.72
	532	2	ALPLA		60	Horizontal		3.34	63.61	12.81
	533	3	ALPLA		60	Horizontal		3.15	63.65	12.76
	534	4	ALPLA		60	Horizontal		3.18	63.71	12.67
	535	5	ALPLA		60	Horizontal		3.13	63.71	12.68
	536	6	ALPLA		60	Horizontal		3.22	63.52	12.71
	537	7	ALPLA		60	Horizontal		3.3	63.66	12.68
	538	8	ALPLA		60	Horizontal		3.27	63.52	12.71
	539	9	ALPLA		60	Horizontal		3.26	63.7	12.69
	540	10	ALPLA		60	Horizontal		3.17	63.64	12.84
	541	1	ALPLA		75	Horizontal		3.26	63.7	12.92
	542	2	ALPLA		75	Horizontal		3.15	63.71	12.6
	543	3	ALPLA		75	Horizontal		3.22	63.74	12.65
	544	4	ALPLA		75	Horizontal		3.31	63.72	12.67
	545	5	ALPLA		75	Horizontal		3.24	63.65	12.81
	546	6	ALPLA		75	Horizontal		3.21	63.6	12.77
	547	7	ALPLA		75	Horizontal		3.32	63.55	12.79
	548	8	ALPLA		75	Horizontal		3.22	63.51	12.82
	549	9	ALPLA		75	Horizontal		3.22	63.81	12.76
	550	10	ALPLA		75	Horizontal		3.24	63.69	12.78
	551	1	ALPLA		90	Horizontal		3.27	63.87	12.76
	552	2	ALPLA		90	Horizontal		3.34	63.79	12.68
	553	3	ALPLA		90	Horizontal		3.22	63.81	12.75
	554	4	ALPLA		90	Horizontal		3.22	63.76	12.88
	555	5	ALPLA		90	Horizontal		3.42	63.8	12.62
	556	6	ALPLA		90	Horizontal		3.15	63.71	12.64
	557	7	ALPLA		90	Horizontal		3.16	63.7	12.65
	558	8	ALPLA		90	Horizontal		3.16	63.7	12.78
	559	9	ALPLA		90	Horizontal		3.2	63.69	12.76
	560	10	ALPLA		90	Horizontal		3.23	63.88	12.72
	561	1	ALPLA		0	Vertical		3.33	63.94	12.7
	562	2	ALPLA		0	Vertical		3.36	63.89	12.73
	563	3	ALPLA		0	Vertical		3.33	63.92	12.75
	564	4	ALPLA		0	Vertical		3.26	63.89	12.82
	565	5	ALPLA		0	Vertical		3.33	63.83	12.69
	566	6	ALPLA		0	Vertical		3.21	63.77	12.65
	567	7	ALPLA		0	Vertical		3.22	63.63	12.6
	568	8	ALPLA		0	Vertical		3.25	63.7	12.74
	569	9	ALPLA		0	Vertical		3.27	63.87	12.58
	570	10	ALPLA		0	Vertical		3.27	63.84	12.63
	571	1	ALPLA		15	Vertical		3.43	63.91	12.89
	572	2	ALPLA		15	Vertical		3.37	63.94	12.83
	573	3	ALPLA		15	Vertical		3.38	64.08	12.79
	574	4	ALPLA		15	Vertical		3.38	63.95	12.84
	575	5	ALPLA		15	Vertical		3.38	63.91	12.8
	576	6	ALPLA		15	Vertical		3.16	63.59	12.55
	577	7	ALPLA		15	Vertical		3.17	63.55	12.62
	578	8	ALPLA		15	Vertical		3.19	63.52	12.65
	579	9	ALPLA		15	Vertical		3.28	63.92	12.81
	580	10	ALPLA		15	Vertical		3.23	63.82	12.65
	581	1	ALPLA		30	Vertical		3.32	63.82	12.81
	582	2	ALPLA		30	Vertical		3.26	63.83	12.82
	583	3	ALPLA		30	Vertical		3.27	63.88	12.71
	584	4	ALPLA		30	Vertical		3.36	63.88	12.7
	585	5	ALPLA		30	Vertical		3.27	63.85	12.77
	586	6	ALPLA		30	Vertical		3.11	63.58	12.66
	587	7	ALPLA		30	Vertical		3.23	63.53	12.52
	588	8	ALPLA		30	Vertical		3.28	63.8	12.7
	589	9	ALPLA		30	Vertical		3.27	63.85	12.69
	590	10	ALPLA		30	Vertical		3.25	63.85	12.65
	591	1	ALPLA		45	Vertical		3.34	63.83	12.75
	592	2	ALPLA		45	Vertical		3.31	63.84	12.86
	593	3	ALPLA		45	Vertical		3.23	63.85	12.84
	594	4	ALPLA		45	Vertical		3.28	63.94	12.69
	595	5	ALPLA		45	Vertical		3.31	63.85	12.81
	596	6	ALPLA		45	Vertical		3.11	63.56	12.66
	597	7	ALPLA		45	Vertical		3.18	63.56	12.57
	598	8	ALPLA		45	Vertical		3.28	63.81	12.77
	599	9	ALPLA		45	Vertical		3.26	63.86	12.78
	600	10	ALPLA		45	Vertical		3.31	63.87	12.8
	601	1	ALPLA		60	Vertical		3.23	63.82	12.87
	602	2	ALPLA		60	Vertical		3.33	63.87	12.77
	603	3	ALPLA		60	Vertical		3.33	63.86	12.74
	604	4	ALPLA		60	Vertical		3.26	63.89	12.61
	605	5	ALPLA		60	Vertical		3.32	63.8	12.86
	606	6	ALPLA		60	Vertical		3.22	63.58	12.55
	607	7	ALPLA		60	Vertical		3.19	63.16	12.64
	608	8	ALPLA		60	Vertical		3.17	63.1	12.57
	609	9	ALPLA		60	Vertical		3.3	63.89	12.77
	610	10	ALPLA		60	Vertical		3.29	63.87	12.68
	611	1	ALPLA		75	Vertical		3.35	63.83	12.71
	612	2	ALPLA		75	Vertical		3.33	63.83	12.74
	613	3	ALPLA		75	Vertical		3.31	63.81	12.89
	614	4	ALPLA		75	Vertical		3.3	63.84	12.89
	615	5	ALPLA		75	Vertical		3.31	63.86	12.77
	616	6	ALPLA		75	Vertical		3.2	63.15	12.61
	617	7	ALPLA		75	Vertical		3.27	63.31	12.64
	618	8	ALPLA		75	Vertical		3.2	63.83	12.83
	619	9	ALPLA		75	Vertical		3.15	63.87	12.74
	620	10	ALPLA		75	Vertical		3.18	63.9	12.77
	621	1	ALPLA		90	Vertical		3.33	63.28	12.69
	622	2	ALPLA		90	Vertical		3.33	63.23	12.84
	623	3	ALPLA		90	Vertical		3.3	63.14	12.64
	624	4	ALPLA		90	Vertical		3.34	63.15	12.69
	625	5	ALPLA		90	Vertical		3.33	63.15	12.9
	626	6	ALPLA		90	Vertical		3.21	63.25	12.65
	627	7	ALPLA		90	Vertical		3.25	63.28	12.52
	628	8	ALPLA		90	Vertical		3.16	63.31	12.73
	629	9	ALPLA		90	Vertical		3.2	63.81	12.79
	630	10	ALPLA		90	Vertical		3.23	63.82	12.76
	631	1	CFPLA		0	Flat		3.28	63.23	12.61
	632	2	CFPLA		0	Flat		3.3	63.22	12.65
	633	3	CFPLA		0	Flat		3.35	63.22	12.75
	634	4	CFPLA		0	Flat		3.24	63.19	12.67
	635	5	CFPLA		0	Flat		3.27	63.24	12.76
	636	6	CFPLA		0	Flat		3.17	63.33	12.74
	637	7	CFPLA		0	Flat		3.19	63.29	12.74
	638	8	CFPLA		0	Flat		3.19	63.32	12.75
	639	9	CFPLA		0	Flat		3.23	63.31	12.75
	640	10	CFPLA		0	Flat		3.17	63.58	12.7
	641	1	CFPLA		15	Flat		3.25	63.27	12.66
	642	2	CFPLA		15	Flat		3.25	63.37	12.71
	643	3	CFPLA		15	Flat		3.22	63.34	12.72
	644	4	CFPLA		15	Flat		3.29	63.26	12.65
	645	5	CFPLA		15	Flat		3.29	63.35	12.71
	646	6	CFPLA		15	Flat		3.24	63.42	12.66
	647	7	CFPLA		15	Flat		3.4	63.41	12.73
	648	8	CFPLA		15	Flat		3.19	63.45	12.69
	649	9	CFPLA		15	Flat		3.25	63.32	12.74
	650	10	CFPLA		15	Flat		3.13	63.56	12.92
	651	1	CFPLA		30	Flat		3.24	63.38	12.58
	652	2	CFPLA		30	Flat		3.3	63.31	12.6
	653	3	CFPLA		30	Flat		3.39	63.35	12.58
	654	4	CFPLA		30	Flat		3.28	63.25	12.58
	655	5	CFPLA		30	Flat		3.22	63.31	12.59
	656	6	CFPLA		30	Flat		3.23	63.46	12.86
	657	7	CFPLA		30	Flat		3.24	63.32	12.72
	658	8	CFPLA		30	Flat		3.23	63.28	12.74
	659	9	CFPLA		30	Flat		3.27	63.31	12.72
	660	10	CFPLA		30	Flat		3.17	63.61	12.84
	661	1	CFPLA		45	Flat		3.28	63.31	12.49
	662	2	CFPLA		45	Flat		3.29	63.5	12.61
	663	3	CFPLA		45	Flat		3.29	63.51	12.57
	664	4	CFPLA		45	Flat		3.29	63.4	12.47
	665	5	CFPLA		45	Flat		3.29	63.43	12.64
	666	6	CFPLA		45	Flat		3.21	63.51	12.79
	667	7	CFPLA		45	Flat		3.25	63.49	12.76
	668	8	CFPLA		45	Flat		3.14	63.42	12.65
	669	9	CFPLA		45	Flat		3.17	63.5	12.76
	670	10	CFPLA		45	Flat		3.15	63.37	12.91
	671	1	CFPLA		60	Flat		3.36	63.54	12.69
	672	2	CFPLA		60	Flat		3.37	63.5	12.61
	673	3	CFPLA		60	Flat		3.38	63.5	12.59
	674	4	CFPLA		60	Flat		3.37	63.51	12.67
	675	5	CFPLA		60	Flat		3.32	63.49	12.62
	676	6	CFPLA		60	Flat		3.22	63.51	12.87
	677	7	CFPLA		60	Flat		3.21	63.49	12.71
	678	8	CFPLA		60	Flat		3.21	63.47	12.65
	679	9	CFPLA		60	Flat		3.19	63.47	12.65
	680	10	CFPLA		60	Flat		3.23	63.82	12.77
	681	1	CFPLA		75	Flat		3.36	63.63	12.66
	682	2	CFPLA		75	Flat		3.41	63.64	12.71
	683	3	CFPLA		75	Flat		3.36	63.66	12.65
	684	4	CFPLA		75	Flat		3.34	63.69	12.69
	685	5	CFPLA		75	Flat		3.35	63.67	12.68
	686	6	CFPLA		75	Flat		3.23	63.58	12.71
	687	7	CFPLA		75	Flat		3.25	63.53	12.54
	688	8	CFPLA		75	Flat		3.21	63.62	12.78
	689	9	CFPLA		75	Flat		3.21	63.67	12.75
	690	10	CFPLA		75	Flat		3.2	63.5	12.67
	691	1	CFPLA		90	Flat		3.44	63.7	12.66
	692	2	CFPLA		90	Flat		3.34	63.7	12.7
	693	3	CFPLA		90	Flat		3.32	63.75	12.64
	694	4	CFPLA		90	Flat		3.3	63.7	12.61
	695	5	CFPLA		90	Flat		3.33	63.65	12.72
	696	6	CFPLA		90	Flat		3.21	63.54	12.76
	697	7	CFPLA		90	Flat		3.23	63.54	12.7
	698	8	CFPLA		90	Flat		3.18	63.57	12.56
	699	9	CFPLA		90	Flat		3.19	63.6	12.68
	700	10	CFPLA		90	Flat		3.18	63.71	12.77
	701	1	CFPLA		0	Horizontal		3.31	63.44	12.97
	702	2	CFPLA		0	Horizontal		3.29	63.45	12.91
	703	3	CFPLA		0	Horizontal		3.25	63.43	12.94
	704	4	CFPLA		0	Horizontal		3.31	63.41	12.91
	705	5	CFPLA		0	Horizontal		3.29	63.49	12.9
	706	6	CFPLA		0	Horizontal		3.19	63.31	12.71
	707	7	CFPLA		0	Horizontal		3.19	63.24	12.79
	708	8	CFPLA		0	Horizontal		3.24	63.55	12.72
	709	9	CFPLA		0	Horizontal		3.21	63.51	12.68
	710	10	CFPLA		0	Horizontal		3.24	63.3	12.74
	711	1	CFPLA		15	Horizontal		3.3	63.46	12.89
	712	2	CFPLA		15	Horizontal		3.29	63.42	12.95
	713	3	CFPLA		15	Horizontal		3.24	63.41	12.93
	714	4	CFPLA		15	Horizontal		3.26	63.48	12.85
	715	5	CFPLA		15	Horizontal		3.3	63.45	12.91
	716	6	CFPLA		15	Horizontal		3.25	63.45	12.74
	717	7	CFPLA		15	Horizontal		3.22	63.25	12.71
	718	8	CFPLA		15	Horizontal		3.2	63.26	12.76
	719	9	CFPLA		15	Horizontal		3.21	63.26	12.82
	720	10	CFPLA		15	Horizontal		3.24	63.47	12.67
	721	1	CFPLA		30	Horizontal		3.25	63.58	12.85
	722	2	CFPLA		30	Horizontal		3.25	63.55	12.9
	723	3	CFPLA		30	Horizontal		3.29	63.57	12.91
	724	4	CFPLA		30	Horizontal		3.24	63.54	12.94
	725	5	CFPLA		30	Horizontal		3.25	63.54	12.92
	726	6	CFPLA		30	Horizontal		3.23	63.51	12.72
	727	7	CFPLA		30	Horizontal		3.22	63.37	12.79
	728	8	CFPLA		30	Horizontal		3.23	63.45	12.74
	729	9	CFPLA		30	Horizontal		3.22	63.37	12.84
	730	10	CFPLA		30	Horizontal		3.26	63.47	12.76
	731	1	CFPLA		45	Horizontal		3.2	63.66	12.83
	732	2	CFPLA		45	Horizontal		3.2	63.53	12.96
	733	3	CFPLA		45	Horizontal		3.18	63.62	12.82
	734	4	CFPLA		45	Horizontal		3.22	63.65	12.92
	735	5	CFPLA		45	Horizontal		3.21	63.62	12.92
	736	6	CFPLA		45	Horizontal		3.2	63.5	12.73
	737	7	CFPLA		45	Horizontal		3.17	63.4	12.7
	738	8	CFPLA		45	Horizontal		3.24	63.28	12.77
	739	9	CFPLA		45	Horizontal		3.25	63.29	12.67
	740	10	CFPLA		45	Horizontal		3.24	63.67	12.78
	741	1	CFPLA		60	Horizontal		3.25	63.66	12.91
	742	2	CFPLA		60	Horizontal		3.21	63.68	12.87
	743	3	CFPLA		60	Horizontal		3.23	63.64	12.9
	744	4	CFPLA		60	Horizontal		3.26	63.67	12.81
	745	5	CFPLA		60	Horizontal		3.17	63.61	12.71
	746	6	CFPLA		60	Horizontal		3.21	63.34	12.75
	747	7	CFPLA		60	Horizontal		3.21	63.37	12.7
	748	8	CFPLA		60	Horizontal		3.17	63.45	12.68
	749	9	CFPLA		60	Horizontal		3.15	63.45	12.76
	750	10	CFPLA		60	Horizontal		3.25	63.73	12.76
	751	1	CFPLA		75	Horizontal		3.2	63.61	12.81
	752	2	CFPLA		75	Horizontal		3.22	63.69	12.9
	753	3	CFPLA		75	Horizontal		3.24	63.65	12.79
	754	4	CFPLA		75	Horizontal		3.16	63.63	12.76
	755	5	CFPLA		75	Horizontal		3.21	63.71	12.94
	756	6	CFPLA		75	Horizontal		3.24	63.39	12.75
	757	7	CFPLA		75	Horizontal		3.21	63.34	12.63
	758	8	CFPLA		75	Horizontal		3.22	63.37	12.75
	759	9	CFPLA		75	Horizontal		3.24	63.39	12.75
	760	10	CFPLA		75	Horizontal		3.24	63.68	12.7
	761	1	CFPLA		90	Horizontal		3.2	63.72	12.75
	762	2	CFPLA		90	Horizontal		3.18	63.69	12.93
	763	3	CFPLA		90	Horizontal		3.18	63.75	12.92
	764	4	CFPLA		90	Horizontal		3.22	63.84	12.91
	765	5	CFPLA		90	Horizontal		3.22	63.71	12.89
	766	6	CFPLA		90	Horizontal		3.2	63.67	12.81
	767	7	CFPLA		90	Horizontal		3.16	63.49	12.73
	768	8	CFPLA		90	Horizontal		3.19	63.52	12.82
	769	9	CFPLA		90	Horizontal		3.23	63.44	12.71
	770	10	CFPLA		90	Horizontal		3.22	63.78	12.67
	771	1	CFPLA		0	Vertical		3.22	63.77	12.72
	772	2	CFPLA		0	Vertical		3.18	63.9	12.65
	773	3	CFPLA		0	Vertical		3.29	63.89	12.67
	774	4	CFPLA		0	Vertical		3.36	63.86	12.76
	775	5	CFPLA		0	Vertical		3.22	64.01	12.69
	776	6	CFPLA		0	Vertical		3.25	63.55	12.59
	777	7	CFPLA		0	Vertical		3.18	63.54	12.7
	778	8	CFPLA		0	Vertical		3.29	63.7	12.69
	779	9	CFPLA		0	Vertical		3.26	63.55	12.67
	780	10	CFPLA		0	Vertical		3.25	63.72	12.57
	781	1	CFPLA		15	Vertical		3.19	63.79	12.69
	782	2	CFPLA		15	Vertical		3.25	63.79	12.72
	783	3	CFPLA		15	Vertical		3.2	63.91	12.67
	784	4	CFPLA		15	Vertical		3.25	63.77	12.63
	785	5	CFPLA		15	Vertical		3.22	63.79	12.61
	786	6	CFPLA		15	Vertical		3.19	63.54	12.75
	787	7	CFPLA		15	Vertical		3.26	63.57	12.72
	788	8	CFPLA		15	Vertical		3.22	63.57	12.54
	789	9	CFPLA		15	Vertical		3.23	63.72	12.69
	790	10	CFPLA		15	Vertical		3.23	63.85	12.6
	791	1	CFPLA		30	Vertical		3.34	63.77	12.59
	792	2	CFPLA		30	Vertical		3.26	63.9	12.62
	793	3	CFPLA		30	Vertical		3.31	63.8	12.56
	794	4	CFPLA		30	Vertical		3.35	63.79	12.58
	795	5	CFPLA		30	Vertical		3.31	63.94	12.68
	796	6	CFPLA		30	Vertical		3.14	63.57	12.6
	797	7	CFPLA		30	Vertical		3.17	63.53	12.54
	798	8	CFPLA		30	Vertical		3.31	63.2	12.67
	799	9	CFPLA		30	Vertical		3.34	63.14	12.64
	800	10	CFPLA		30	Vertical		3.26	63.77	12.73
	801	1	CFPLA		45	Vertical		3.19	63.81	12.63
	802	2	CFPLA		45	Vertical		3.22	63.8	12.68
	803	3	CFPLA		45	Vertical		3.17	63.84	12.73
	804	4	CFPLA		45	Vertical		3.23	63.81	12.62
	805	5	CFPLA		45	Vertical		3.19	63.89	12.67
	806	6	CFPLA		45	Vertical		3.16	63.52	12.68
	807	7	CFPLA		45	Vertical		3.17	63.57	12.67
	808	8	CFPLA		45	Vertical		3.21	63.76	12.67
	809	9	CFPLA		45	Vertical		3.26	63.73	12.74
	810	10	CFPLA		45	Vertical		3.26	63.77	12.82
	811	1	CFPLA		60	Vertical		3.24	63.89	12.61
	812	2	CFPLA		60	Vertical		3.29	63.97	12.62
	813	3	CFPLA		60	Vertical		3.3	63.79	12.73
	814	4	CFPLA		60	Vertical		3.22	63.81	12.68
	815	5	CFPLA		60	Vertical		3.26	63.72	12.6
	816	6	CFPLA		60	Vertical		3.19	63.57	12.59
	817	7	CFPLA		60	Vertical		3.18	63.68	12.76
	818	8	CFPLA		60	Vertical		3.15	63.59	12.66
	819	9	CFPLA		60	Vertical		3.25	63.75	12.8
	820	10	CFPLA		60	Vertical		3.19	63.77	12.58
	821	1	CFPLA		75	Vertical		3.21	63.82	12.7
	822	2	CFPLA		75	Vertical		3.3	63.83	12.79
	823	3	CFPLA		75	Vertical		3.33	64.02	12.67
	824	4	CFPLA		75	Vertical		3.28	63.8	12.64
	825	5	CFPLA		75	Vertical		3.3	63.83	12.68
	826	6	CFPLA		75	Vertical		3.22	63.58	12.7
	827	7	CFPLA		75	Vertical		3.24	63.52	12.7
	828	8	CFPLA		75	Vertical		3.15	63.57	12.69
	829	9	CFPLA		75	Vertical		3.16	63.58	12.66
	830	10	CFPLA		75	Vertical		3.18	63.6	12.73
	831	1	CFPLA		90	Vertical		3.13	63.79	12.64
	832	2	CFPLA		90	Vertical		3.16	63.81	12.64
	833	3	CFPLA		90	Vertical		3.15	63.82	12.68
	834	4	CFPLA		90	Vertical		3.19	63.81	12.63
	835	5	CFPLA		90	Vertical		3.15	63.77	12.62
	836	6	CFPLA		90	Vertical		3.17	63.5	12.76
	837	7	CFPLA		90	Vertical		3.26	63.72	12.74
	838	8	CFPLA		90	Vertical		3.3	63.77	12.75
	839	9	CFPLA		90	Vertical		3.22	63.73	12.72
	840	10	CFPLA		90	Vertical		3.23	63.54	12.66
	841	1	HIPS		0	Flat		3.18	63.43	12.86
	842	2	HIPS		0	Flat		3.14	63.46	12.93
	843	3	HIPS		0	Flat		3.16	63.44	12.86
	844	4	HIPS		0	Flat		3.07	63.47	12.95
	845	5	HIPS		0	Flat		3.13	63.38	12.97
	846	6	HIPS		0	Flat		3.33	63.53	12.57
	847	7	HIPS		0	Flat		3.39	63.57	12.7
	848	8	HIPS		0	Flat		3.3	63.4	12.54
	849	9	HIPS		0	Flat		3.33	63.29	12.78
	850	10	HIPS		0	Flat		3.25	63.27	12.65
	851	1	HIPS		15	Flat		3.14	63.42	12.99
	852	2	HIPS		15	Flat		3.22	63.39	12.97
	853	3	HIPS		15	Flat		3.2	63.39	12.96
	854	4	HIPS		15	Flat		3.19	63.39	12.92
	855	5	HIPS		15	Flat		3.18	63.47	12.94
	856	6	HIPS		15	Flat		3.13	63.56	12.7
	857	7	HIPS		15	Flat		3.2	63.44	12.59
	858	8	HIPS		15	Flat		3.34	63.51	12.66
	859	9	HIPS		15	Flat		3.35	63.31	12.72
	860	10	HIPS		15	Flat		3.32	63.27	12.71
	861	1	HIPS		30	Flat		3.14	63.37	12.88
	862	2	HIPS		30	Flat		3.14	63.48	13.01
	863	3	HIPS		30	Flat		3.19	63.44	12.93
	864	4	HIPS		30	Flat		3.17	63.45	12.96
	865	5	HIPS		30	Flat		3.13	63.42	12.79
	866	6	HIPS		30	Flat		3.27	63.53	12.68
	867	7	HIPS		30	Flat		3.17	63.77	12.69
	868	8	HIPS		30	Flat		3.21	63.51	12.63
	869	9	HIPS		30	Flat		3.33	63.43	12.74
	870	10	HIPS		30	Flat		3.19	63.41	12.75
	871	1	HIPS		45	Flat		3.19	63.49	12.9
	872	2	HIPS		45	Flat		3.16	63.48	12.94
	873	3	HIPS		45	Flat		3.16	63.44	12.89
	874	4	HIPS		45	Flat		3.18	63.42	12.89
	875	5	HIPS		45	Flat		3.1	63.51	12.81
	876	6	HIPS		45	Flat		3.22	63.48	12.7
	877	7	HIPS		45	Flat		3.32	63.34	12.56
	878	8	HIPS		45	Flat		3.26	63.47	12.62
	879	9	HIPS		45	Flat		3.29	63.21	12.71
	880	10	HIPS		45	Flat		3.27	63.34	12.79
	881	1	HIPS		60	Flat		3.17	63.38	12.91
	882	2	HIPS		60	Flat		3.19	63.39	12.87
	883	3	HIPS		60	Flat		3.11	63.28	12.84
	884	4	HIPS		60	Flat		3.19	63.46	12.94
	885	5	HIPS		60	Flat		3.15	63.39	12.79
	886	6	HIPS		60	Flat		3.41	63.47	12.61
	887	7	HIPS		60	Flat		3.23	63.5	12.7
	888	8	HIPS		60	Flat		3.25	63.55	12.61
	889	9	HIPS		60	Flat		3.19	63.39	12.67
	890	10	HIPS		60	Flat		3.33	63.23	12.66
	891	1	HIPS		75	Flat		3.16	63.27	12.92
	892	2	HIPS		75	Flat		3.11	63.32	12.93
	893	3	HIPS		75	Flat		3.11	63.29	12.93
	894	4	HIPS		75	Flat		3.08	63.29	12.92
	895	5	HIPS		75	Flat		3.13	63.24	12.93
	896	6	HIPS		75	Flat		3.32	63.5	12.63
	897	7	HIPS		75	Flat		3.26	63.47	12.56
	898	8	HIPS		75	Flat		3.27	63.47	12.74
	899	9	HIPS		75	Flat		3.36	63.26	12.63
	900	10	HIPS		75	Flat		3.37	63.25	12.67
	901	1	HIPS		90	Flat		3.14	63.56	12.86
	902	2	HIPS		90	Flat		3.13	63.37	12.86
	903	3	HIPS		90	Flat		3.14	63.39	13.09
	904	4	HIPS		90	Flat		3.08	63.42	12.82
	905	5	HIPS		90	Flat		3.11	63.44	12.85
	906	6	HIPS		90	Flat		3.19	63.57	12.58
	907	7	HIPS		90	Flat		3.12	63.51	12.59
	908	8	HIPS		90	Flat		3.14	63.43	12.51
	909	9	HIPS		90	Flat		3.35	63.42	12.71
	910	10	HIPS		90	Flat		3.27	63.29	12.72
	911	1	HIPS		0	Horizontal		3.21	63.46	12.79
	912	2	HIPS		0	Horizontal		3.27	63.46	12.66
	913	3	HIPS		0	Horizontal		3.25	63.5	12.82
	914	4	HIPS		0	Horizontal		3.24	63.54	12.61
	915	5	HIPS		0	Horizontal		3.27	63.47	12.68
	916	6	HIPS		0	Horizontal		3.27	63.47	12.57
	917	7	HIPS		0	Horizontal		3.22	63.52	12.61
	918	8	HIPS		0	Horizontal		3.22	63.5	12.63
	919	9	HIPS		0	Horizontal		3.21	63.61	12.79
	920	10	HIPS		0	Horizontal		3.32	63.32	12.63
	921	1	HIPS		15	Horizontal		3.27	63.46	12.63
	922	2	HIPS		15	Horizontal		3.33	63.44	12.7
	923	3	HIPS		15	Horizontal		3.29	63.42	12.65
	924	4	HIPS		15	Horizontal		3.31	63.57	12.62
	925	5	HIPS		15	Horizontal		3.25	63.47	12.66
	926	6	HIPS		15	Horizontal		3.25	63.55	12.67
	927	7	HIPS		15	Horizontal		3.26	63.5	12.64
	928	8	HIPS		15	Horizontal		3.17	63.46	12.74
	929	9	HIPS		15	Horizontal		3.19	63.52	12.77
	930	10	HIPS		15	Horizontal		3.31	63.36	12.63
	931	1	HIPS		30	Horizontal		3.26	63.54	12.67
	932	2	HIPS		30	Horizontal		3.22	63.53	12.7
	933	3	HIPS		30	Horizontal		3.24	63.54	12.79
	934	4	HIPS		30	Horizontal		3.29	63.6	12.72
	935	5	HIPS		30	Horizontal		3.28	63.55	12.79
	936	6	HIPS		30	Horizontal		3.24	63.51	12.66
	937	7	HIPS		30	Horizontal		3.28	63.6	12.6
	938	8	HIPS		30	Horizontal		3.21	63.53	12.69
	939	9	HIPS		30	Horizontal		3.25	63.48	12.78
	940	10	HIPS		30	Horizontal		3.25	63.45	12.77
	941	1	HIPS		45	Horizontal		3.24	63.53	12.72
	942	2	HIPS		45	Horizontal		3.28	63.45	12.7
	943	3	HIPS		45	Horizontal		3.23	63.44	12.63
	944	4	HIPS		45	Horizontal		3.27	63.51	12.61
	945	5	HIPS		45	Horizontal		3.28	63.43	12.63
	946	6	HIPS		45	Horizontal		3.22	63.49	12.63
	947	7	HIPS		45	Horizontal		3.21	63.53	12.62
	948	8	HIPS		45	Horizontal		3.23	63.45	12.83
	949	9	HIPS		45	Horizontal		3.18	63.53	12.73
	950	10	HIPS		45	Horizontal		3.16	63.39	12.86
	951	1	HIPS		60	Horizontal		3.27	63.41	12.77
	952	2	HIPS		60	Horizontal		3.24	63.49	12.76
	953	3	HIPS		60	Horizontal		3.24	63.49	12.72
	954	4	HIPS		60	Horizontal		3.27	63.45	12.65
	955	5	HIPS		60	Horizontal		3.24	63.47	12.76
	956	6	HIPS		60	Horizontal		3.25	63.48	12.67
	957	7	HIPS		60	Horizontal		3.21	63.5	12.58
	958	8	HIPS		60	Horizontal		3.22	63.54	12.67
	959	9	HIPS		60	Horizontal		3.21	63.44	12.87
	960	10	HIPS		60	Horizontal		3.21	63.36	12.78
	961	1	HIPS		75	Horizontal		3.31	63.51	12.63
	962	2	HIPS		75	Horizontal		3.26	63.5	12.65
	963	3	HIPS		75	Horizontal		3.3	63.56	12.69
	964	4	HIPS		75	Horizontal		3.25	63.5	12.72
	965	5	HIPS		75	Horizontal		3.21	63.47	12.76
	966	6	HIPS		75	Horizontal		3.23	63.57	12.69
	967	7	HIPS		75	Horizontal		3.26	63.52	12.65
	968	8	HIPS		75	Horizontal		3.23	63.49	12.62
	969	9	HIPS		75	Horizontal		3.24	63.46	12.87
	970	10	HIPS		75	Horizontal		3.24	63.29	12.76
	971	1	HIPS		90	Horizontal		3.27	63.45	12.68
	972	2	HIPS		90	Horizontal		3.23	63.48	12.72
	973	3	HIPS		90	Horizontal		3.26	63.52	12.66
	974	4	HIPS		90	Horizontal		3.25	63.54	12.72
	975	5	HIPS		90	Horizontal		3.27	63.53	12.61
	976	6	HIPS		90	Horizontal		3.25	63.54	12.66
	977	7	HIPS		90	Horizontal		3.18	63.52	12.72
	978	8	HIPS		90	Horizontal		3.25	63.53	12.69
	979	9	HIPS		90	Horizontal		3.24	63.52	12.83
	980	10	HIPS		90	Horizontal		3.22	63.43	12.71
	981	1	HIPS		0	Vertical		3.23	63.25	12.76
	982	2	HIPS		0	Vertical		3.22	63.25	12.71
	983	3	HIPS		0	Vertical		3.3	63.25	12.76
	984	4	HIPS		0	Vertical		3.21	63.2	12.75
	985	5	HIPS		0	Vertical		3.21	63.28	12.73
	986	6	HIPS		0	Vertical		3.18	63.35	12.74
	987	7	HIPS		0	Vertical		3.19	63.32	12.75
	988	8	HIPS		0	Vertical		3.19	63.37	12.71
	989	9	HIPS		0	Vertical		3.19	63.59	12.66
	990	10	HIPS		0	Vertical		3.18	63.58	12.6
	991	1	HIPS		15	Vertical		3.28	63.25	12.81
	992	2	HIPS		15	Vertical		3.23	63.2	12.85
	993	3	HIPS		15	Vertical		3.22	63.31	12.82
	994	4	HIPS		15	Vertical		3.23	63.24	12.82
	995	5	HIPS		15	Vertical		3.24	63.26	12.83
	996	6	HIPS		15	Vertical		3.24	63.3	12.73
	997	7	HIPS		15	Vertical		3.26	63.28	12.61
	998	8	HIPS		15	Vertical		3.29	63.54	12.74
	999	9	HIPS		15	Vertical		3.28	63.6	12.73
	1000	10	HIPS		15	Vertical		3.22	63.51	12.73
	1001	1	HIPS		30	Vertical		3.22	63.22	12.75
	1002	2	HIPS		30	Vertical		3.24	63.29	12.79
	1003	3	HIPS		30	Vertical		3.21	63.26	12.8
	1004	4	HIPS		30	Vertical		3.29	63.29	12.77
	1005	5	HIPS		30	Vertical		3.21	63.3	12.7
	1006	6	HIPS		30	Vertical		3.25	63.27	12.71
	1007	7	HIPS		30	Vertical		3.19	63.31	12.66
	1008	8	HIPS		30	Vertical		3.22	63.35	12.68
	1009	9	HIPS		30	Vertical		3.24	63.58	12.72
	1010	10	HIPS		30	Vertical		3.26	63.55	12.65
	1011	1	HIPS		45	Vertical		3.28	63.29	12.74
	1012	2	HIPS		45	Vertical		3.24	63.34	12.77
	1013	3	HIPS		45	Vertical		3.28	63.21	12.74
	1014	4	HIPS		45	Vertical		3.26	63.27	12.76
	1015	5	HIPS		45	Vertical		3.24	63.24	12.74
	1016	6	HIPS		45	Vertical		3.25	63.31	12.69
	1017	7	HIPS		45	Vertical		3.26	63.48	12.66
	1018	8	HIPS		45	Vertical		3.27	63.44	12.7
	1019	9	HIPS		45	Vertical		3.28	63.52	12.74
	1020	10	HIPS		45	Vertical		3.3	63.48	12.79
	1021	1	HIPS		60	Vertical		3.27	63.33	12.76
	1022	2	HIPS		60	Vertical		3.29	63.27	12.81
	1023	3	HIPS		60	Vertical		3.24	63.27	12.76
	1024	4	HIPS		60	Vertical		3.28	63.26	12.87
	1025	5	HIPS		60	Vertical		3.32	63.25	12.87
	1026	6	HIPS		60	Vertical		3.25	63.25	12.75
	1027	7	HIPS		60	Vertical		3.27	63.34	12.68
	1028	8	HIPS		60	Vertical		3.26	63.33	12.69
	1029	9	HIPS		60	Vertical		3.32	63.54	12.8
	1030	10	HIPS		60	Vertical		3.31	63.44	12.76
	1031	1	HIPS		75	Vertical		3.32	63.26	12.75
	1032	2	HIPS		75	Vertical		3.3	63.22	12.9
	1033	3	HIPS		75	Vertical		3.35	63.27	12.79
	1034	4	HIPS		75	Vertical		3.33	63.21	12.79
	1035	5	HIPS		75	Vertical		3.36	63.29	12.77
	1036	6	HIPS		75	Vertical		3.23	63.26	12.67
	1037	7	HIPS		75	Vertical		3.24	63.36	12.67
	1038	8	HIPS		75	Vertical		3.25	63.35	12.63
	1039	9	HIPS		75	Vertical		3.32	63.48	12.75
	1040	10	HIPS		75	Vertical		3.33	63.43	12.76
	1041	1	HIPS		90	Vertical		3.34	63.23	12.81
	1042	2	HIPS		90	Vertical		3.33	63.18	12.74
	1043	3	HIPS		90	Vertical		3.24	63.23	12.72
	1044	4	HIPS		90	Vertical		3.26	63.24	12.74
	1045	5	HIPS		90	Vertical		3.33	63.28	12.73
	1046	6	HIPS		90	Vertical		3.21	63.34	12.73
	1047	7	HIPS		90	Vertical		3.25	63.36	12.66
	1048	8	HIPS		90	Vertical		3.28	63.51	12.73
	1049	9	HIPS		90	Vertical		3.27	63.57	12.78
	1050	10	HIPS		90	Vertical		3.28	63.53	12.8
	1051	1	Nylon		0	Flat		3.26	62.77	12.77
	1052	2	Nylon		0	Flat		3.19	62.85	12.87
	1053	3	Nylon		0	Flat		3.23	62.84	12.8
	1054	4	Nylon		0	Flat		3.26	63.71	12.72
	1055	5	Nylon		0	Flat		3.25	63.71	12.72
	1056	6	Nylon		0	Flat		3.11	63.25	12.68
	1057	7	Nylon		0	Flat		3.1	63.08	12.55
	1058	8	Nylon		0	Flat		3.18	63.18	12.62
	1059	9	Nylon		0	Flat		3.2	63.28	12.73
	1060	10	Nylon		0	Flat		3.28	63.26	12.75
	1061	1	Nylon		15	Flat		3.28	63.52	12.63
	1062	2	Nylon		15	Flat		3.2	63.03	12.81
	1063	3	Nylon		15	Flat		3.28	63.67	12.72
	1064	4	Nylon		15	Flat		3.29	63.63	12.71
	1065	5	Nylon		15	Flat		3.32	63.56	12.68
	1066	6	Nylon		15	Flat		3.15	63.15	12.73
	1067	7	Nylon		15	Flat		3.22	62.87	12.48
	1068	8	Nylon		15	Flat		3.16	62.89	12.55
	1069	9	Nylon		15	Flat		3.22	62.98	12.63
	1070	10	Nylon		15	Flat		3.21	63.2	12.75
	1071	1	Nylon		30	Flat		3.26	63.71	12.77
	1072	2	Nylon		30	Flat		3.29	63.6	12.75
	1073	3	Nylon		30	Flat		3.23	62.95	12.89
	1074	4	Nylon		30	Flat		3.33	63.59	12.74
	1075	5	Nylon		30	Flat		3.34	63.53	12.69
	1076	6	Nylon		30	Flat		3.28	62.92	12.55
	1077	7	Nylon		30	Flat		3.3	63.35	12.76
	1078	8	Nylon		30	Flat		3.21	63.32	12.77
	1079	9	Nylon		30	Flat		3.22	63.27	12.75
	1080	10	Nylon		30	Flat		3.19	63.16	12.83
	1081	1	Nylon		45	Flat		3.28	63.54	12.65
	1082	2	Nylon		45	Flat		3.28	63.52	12.68
	1083	3	Nylon		45	Flat		3.29	63.62	12.72
	1084	4	Nylon		45	Flat		3.2	63.77	12.79
	1085	5	Nylon		45	Flat		3.21	63.03	12.84
	1086	6	Nylon		45	Flat		3.17	62.93	12.72
	1087	7	Nylon		45	Flat		3.17	63.38	12.64
	1088	8	Nylon		45	Flat		3.22	62.81	12.59
	1089	9	Nylon		45	Flat		3.16	63.11	12.75
	1090	10	Nylon		45	Flat		3.17	63.2	12.75
	1091	1	Nylon		60	Flat		3.28	63	12.93
	1092	2	Nylon		60	Flat		3.32	63.72	12.71
	1093	3	Nylon		60	Flat		3.27	63.78	12.87
	1094	4	Nylon		60	Flat		3.31	62.66	12.69
	1095	5	Nylon		60	Flat		3.3	63.71	12.77
	1096	6	Nylon		60	Flat		3.18	62.9	12.63
	1097	7	Nylon		60	Flat		3.22	63.5	12.79
	1098	8	Nylon		60	Flat		3.22	63.14	12.63
	1099	9	Nylon		60	Flat		3.27	63.21	12.68
	1100	10	Nylon		60	Flat		3.26	63.18	12.69
	1101	1	Nylon		75	Flat		3.32	62.91	12.79
	1102	2	Nylon		75	Flat		3.3	63.69	12.64
	1103	3	Nylon		75	Flat		3.33	63.7	12.64
	1104	4	Nylon		75	Flat		3.33	63.86	12.71
	1105	5	Nylon		75	Flat		3.33	63.67	12.7
	1106	6	Nylon		75	Flat		3.18	62.88	12.65
	1107	7	Nylon		75	Flat		3.24	63.17	12.69
	1108	8	Nylon		75	Flat		3.24	63.03	12.69
	1109	9	Nylon		75	Flat		3.3	63.25	12.74
	1110	10	Nylon		75	Flat		3.25	63.21	12.76
	1111	1	Nylon		90	Flat		3.28	63.03	12.77
	1112	2	Nylon		90	Flat		3.25	63.8	12.82
	1113	3	Nylon		90	Flat		3.22	63.25	12.88
	1114	4	Nylon		90	Flat		3.24	62.85	12.66
	1115	5	Nylon		90	Flat		3.29	62.81	12.74
	1116	6	Nylon		90	Flat		3.24	63.52	12.46
	1117	7	Nylon		90	Flat		3.16	63.64	12.6
	1118	8	Nylon		90	Flat		3.16	63.25	12.66
	1119	9	Nylon		90	Flat		3.16	63.16	12.8
	1120	10	Nylon		90	Flat		3.24	63.11	12.71
	1121	1	Nylon		0	Horizontal		3.13	63.81	12.7
	1122	2	Nylon		0	Horizontal		3.3	62.87	12.68
	1123	3	Nylon		0	Horizontal		3.27	62.86	12.68
	1124	4	Nylon		0	Horizontal		3.36	63.74	12.6
	1125	5	Nylon		0	Horizontal		3.28	63.01	12.64
	1126	6	Nylon		0	Horizontal		3.17	63.46	12.77
	1127	7	Nylon		0	Horizontal		3.21	63.65	12.67
	1128	8	Nylon		0	Horizontal		3.21	63.51	12.62
	1129	9	Nylon		0	Horizontal		3.24	63.5	12.67
	1130	10	Nylon		0	Horizontal		3.25	63.35	12.78
	1131	1	Nylon		15	Horizontal		3.29	63.69	12.78
	1132	2	Nylon		15	Horizontal		3.19	62.82	12.62
	1133	3	Nylon		15	Horizontal		3.25	62.94	12.68
	1134	4	Nylon		15	Horizontal		3.4	63.66	12.72
	1135	5	Nylon		15	Horizontal		3.22	63.62	12.66
	1136	6	Nylon		15	Horizontal		3.23	63.28	12.58
	1137	7	Nylon		15	Horizontal		3.09	63.39	12.66
	1138	8	Nylon		15	Horizontal		3.23	63.22	12.68
	1139	9	Nylon		15	Horizontal		3.24	63.25	12.59
	1140	10	Nylon		15	Horizontal		3.26	63.45	12.77
	1141	1	Nylon		30	Horizontal		3.37	62.8	12.71
	1142	2	Nylon		30	Horizontal		3.18	63.71	12.66
	1143	3	Nylon		30	Horizontal		3.29	63.04	12.71
	1144	4	Nylon		30	Horizontal		3.19	62.82	12.7
	1145	5	Nylon		30	Horizontal		3.33	62.94	12.69
	1146	6	Nylon		30	Horizontal		3.12	63.09	12.67
	1147	7	Nylon		30	Horizontal		3.19	63.18	12.69
	1148	8	Nylon		30	Horizontal		3.04	63.54	12.67
	1149	9	Nylon		30	Horizontal		3.21	63.33	12.72
	1150	10	Nylon		30	Horizontal		3.24	63.32	12.75
	1151	1	Nylon		45	Horizontal		3.26	63.76	12.66
	1152	2	Nylon		45	Horizontal		3.31	63.71	12.71
	1153	3	Nylon		45	Horizontal		3.27	63.13	12.68
	1154	4	Nylon		45	Horizontal		3.35	63.76	12.66
	1155	5	Nylon		45	Horizontal		3.29	62.93	12.68
	1156	6	Nylon		45	Horizontal		3.23	63.15	12.59
	1157	7	Nylon		45	Horizontal		3.16	63	12.49
	1158	8	Nylon		45	Horizontal		3.25	63.19	12.7
	1159	9	Nylon		45	Horizontal		3.24	63.2	12.67
	1160	10	Nylon		45	Horizontal		3.21	63.22	12.71
	1161	1	Nylon		60	Horizontal		3.39	63.86	12.59
	1162	2	Nylon		60	Horizontal		3.36	63.82	12.69
	1163	3	Nylon		60	Horizontal		3.36	62.74	12.66
	1164	4	Nylon		60	Horizontal		3.23	63.04	12.75
	1165	5	Nylon		60	Horizontal		3.28	62.98	12.71
	1166	6	Nylon		60	Horizontal		3.25	63.21	12.61
	1167	7	Nylon		60	Horizontal		3.27	63.14	12.64
	1168	8	Nylon		60	Horizontal		3.33	63.13	12.66
	1169	9	Nylon		60	Horizontal		3.19	63.31	12.73
	1170	10	Nylon		60	Horizontal		3.22	63.25	12.75
	1171	1	Nylon		75	Horizontal		3.33	62.92	12.68
	1172	2	Nylon		75	Horizontal		3.22	63.24	12.74
	1173	3	Nylon		75	Horizontal		3.23	62.95	12.75
	1174	4	Nylon		75	Horizontal		3.26	63.85	12.74
	1175	5	Nylon		75	Horizontal		3.29	63.16	12.68
	1176	6	Nylon		75	Horizontal		3.12	63.38	12.64
	1177	7	Nylon		75	Horizontal		3.23	63.33	12.69
	1178	8	Nylon		75	Horizontal		3.26	63.24	12.65
	1179	9	Nylon		75	Horizontal		3.3	63.71	12.79
	1180	10	Nylon		75	Horizontal		3.26	63.22	12.75
	1181	1	Nylon		90	Horizontal		3.21	62.91	12.73
	1182	2	Nylon		90	Horizontal		3.24	63.37	12.76
	1183	3	Nylon		90	Horizontal		3.17	62.8	12.71
	1184	4	Nylon		90	Horizontal		3.37	62.84	12.75
	1185	5	Nylon		90	Horizontal		3.33	63.01	12.81
	1186	6	Nylon		90	Horizontal		3.16	63.55	12.69
	1187	7	Nylon		90	Horizontal		3.19	63.45	12.74
	1188	8	Nylon		90	Horizontal		3.12	63.55	12.67
	1189	9	Nylon		90	Horizontal		3.24	63.3	12.71
	1190	10	Nylon		90	Horizontal		3.21	63.29	12.69
	1191	1	Nylon		0	Vertical		3.34	63.23	12.67
	1192	2	Nylon		0	Vertical		3.29	63.21	12.66
	1193	3	Nylon		0	Vertical		3.25	63.18	12.7
	1194	4	Nylon		0	Vertical		3.23	63.24	12.66
	1195	5	Nylon		0	Vertical		3.25	63.23	12.58
	1196	6	Nylon		0	Vertical		3.29	63.5	12.71
	1197	7	Nylon		0	Vertical		3.27	63.35	12.69
	1198	8	Nylon		0	Vertical		3.11	63.7	12.62
	1199	9	Nylon		0	Vertical		3.29	63.6	12.68
	1200	10	Nylon		0	Vertical		3.26	63.57	12.66
	1201	1	Nylon		15	Vertical		3.26	63.22	12.58
	1202	2	Nylon		15	Vertical		3.31	63.26	12.64
	1203	3	Nylon		15	Vertical		3.22	63.16	12.92
	1204	4	Nylon		15	Vertical		3.24	63.12	12.79
	1205	5	Nylon		15	Vertical		3.22	63.27	12.67
	1206	6	Nylon		15	Vertical		3.25	63.41	12.67
	1207	7	Nylon		15	Vertical		3.22	63.31	12.87
	1208	8	Nylon		15	Vertical		3.26	63.28	12.69
	1209	9	Nylon		15	Vertical		3.28	63.51	12.67
	1210	10	Nylon		15	Vertical		3.28	63.55	12.67
	1211	1	Nylon		30	Vertical		3.28	63.1	12.91
	1212	2	Nylon		30	Vertical		3.26	63.2	12.65
	1213	3	Nylon		30	Vertical		3.37	63.12	12.76
	1214	4	Nylon		30	Vertical		3.28	63.15	12.65
	1215	5	Nylon		30	Vertical		3.32	63.09	12.61
	1216	6	Nylon		30	Vertical		3.24	63.7	12.66
	1217	7	Nylon		30	Vertical		3.24	63.25	12.66
	1218	8	Nylon		30	Vertical		3.25	63.39	12.66
	1219	9	Nylon		30	Vertical		3.27	63.42	12.7
	1220	10	Nylon		30	Vertical		3.3	63.44	12.63
	1221	1	Nylon		45	Vertical		3.19	63.22	12.62
	1222	2	Nylon		45	Vertical		3.36	63.15	12.72
	1223	3	Nylon		45	Vertical		3.29	63.15	12.65
	1224	4	Nylon		45	Vertical		3.3	63.12	12.66
	1225	5	Nylon		45	Vertical		3.25	63.16	12.65
	1226	6	Nylon		45	Vertical		3.28	63.65	12.69
	1227	7	Nylon		45	Vertical		3.27	63.32	12.7
	1228	8	Nylon		45	Vertical		3.25	63.74	12.66
	1229	9	Nylon		45	Vertical		3.31	63.55	12.58
	1230	10	Nylon		45	Vertical		3.25	63.46	12.66
	1231	1	Nylon		60	Vertical		3.27	63.19	12.72
	1232	2	Nylon		60	Vertical		3.24	63.28	12.65
	1233	3	Nylon		60	Vertical		3.18	63.42	12.66
	1234	4	Nylon		60	Vertical		3.26	63.16	12.56
	1235	5	Nylon		60	Vertical		3.23	63.45	12.63
	1236	6	Nylon		60	Vertical		3.26	63.66	12.71
	1237	7	Nylon		60	Vertical		3.25	63.63	12.82
	1238	8	Nylon		60	Vertical		3.24	63.51	12.69
	1239	9	Nylon		60	Vertical		3.28	63.49	12.68
	1240	10	Nylon		60	Vertical		3.26	63.35	12.54
	1241	1	Nylon		75	Vertical		3.28	63.13	12.73
	1242	2	Nylon		75	Vertical		3.28	63.22	12.64
	1243	3	Nylon		75	Vertical		3.25	63.18	12.69
	1244	4	Nylon		75	Vertical		3.29	63.15	12.71
	1245	5	Nylon		75	Vertical		3.26	63.17	12.69
	1246	6	Nylon		75	Vertical		3.25	63.25	12.7
	1247	7	Nylon		75	Vertical		3.25	63.61	12.59
	1248	8	Nylon		75	Vertical		3.27	63.56	12.63
	1249	9	Nylon		75	Vertical		3.26	63.38	12.63
	1250	10	Nylon		75	Vertical		3.26	63.39	12.69
	1251	1	Nylon		90	Vertical		3.33	63.32	12.71
	1252	2	Nylon		90	Vertical		3.22	63.09	12.79
	1253	3	Nylon		90	Vertical		3.23	63.26	12.69
	1254	4	Nylon		90	Vertical		3.28	63.2	12.76
	1255	5	Nylon		90	Vertical		3.25	63.28	12.69
	1256	6	Nylon		90	Vertical		3.24	63.55	12.73
	1257	7	Nylon		90	Vertical		3.22	63.43	12.68
	1258	8	Nylon		90	Vertical		3.25	63.77	12.71
	1259	9	Nylon		90	Vertical		3.27	63.49	12.71
	1260	10	Nylon		90	Vertical		3.33	63.4	12.63
	1261	1	HTPLA		0	Flat		3.27	63.29	12.72
	1262	2	HTPLA		0	Flat		3.37	63.29	12.89
	1263	3	HTPLA		0	Flat		3.37	63.33	12.74
	1264	4	HTPLA		0	Flat		3.37	63.27	12.73
	1265	5	HTPLA		0	Flat		3.33	63.29	12.78
	1266	6	HTPLA		0	Flat		3.22	63.31	12.72
	1267	7	HTPLA		0	Flat		3.2	63.26	12.64
	1268	8	HTPLA		0	Flat		3.23	63.29	12.71
	1269	9	HTPLA		0	Flat		3.24	63.49	12.64
	1270	10	HTPLA		0	Flat		3.24	63.47	12.66
	1271	1	HTPLA		15	Flat		3.34	63.35	12.92
	1272	2	HTPLA		15	Flat		3.36	63.27	12.71
	1273	3	HTPLA		15	Flat		3.38	63.29	12.86
	1274	4	HTPLA		15	Flat		3.42	63.24	12.7
	1275	5	HTPLA		15	Flat		3.4	63.26	12.72
	1276	6	HTPLA		15	Flat		3.19	63.35	12.68
	1277	7	HTPLA		15	Flat		3.22	63.28	12.61
	1278	8	HTPLA		15	Flat		3.23	63.29	12.67
	1279	9	HTPLA		15	Flat		3.2	63.33	12.73
	1280	10	HTPLA		15	Flat		3.12	63.38	12.8
	1281	1	HTPLA		30	Flat		3.36	63.45	12.81
	1282	2	HTPLA		30	Flat		3.38	63.42	12.8
	1283	3	HTPLA		30	Flat		3.35	63.59	12.73
	1284	4	HTPLA		30	Flat		3.35	63.46	12.8
	1285	5	HTPLA		30	Flat		3.37	63.47	12.74
	1286	6	HTPLA		30	Flat		3.24	63.82	12.81
	1287	7	HTPLA		30	Flat		3.24	63.49	12.7
	1288	8	HTPLA		30	Flat		3.14	63.74	12.58
	1289	9	HTPLA		30	Flat		3.22	63.48	12.76
	1290	10	HTPLA		30	Flat		3.15	63.47	12.69
	1291	1	HTPLA		45	Flat		3.35	63.54	12.7
	1292	2	HTPLA		45	Flat		3.34	63.5	12.79
	1293	3	HTPLA		45	Flat		3.42	63.48	12.63
	1294	4	HTPLA		45	Flat		3.35	63.53	12.7
	1295	5	HTPLA		45	Flat		3.36	63.52	12.65
	1296	6	HTPLA		45	Flat		3.22	63.4	12.52
	1297	7	HTPLA		45	Flat		3.21	63.5	12.61
	1298	8	HTPLA		45	Flat		3.29	63.34	12.7
	1299	9	HTPLA		45	Flat		3.23	63.53	12.86
	1300	10	HTPLA		45	Flat		3.23	63.49	12.75
	1301	1	HTPLA		60	Flat		3.36	63.5	12.66
	1302	2	HTPLA		60	Flat		3.36	63.65	12.67
	1303	3	HTPLA		60	Flat		3.35	63.54	12.67
	1304	4	HTPLA		60	Flat		3.33	63.56	12.61
	1305	5	HTPLA		60	Flat		3.33	63.64	12.62
	1306	6	HTPLA		60	Flat		3.23	63.52	12.59
	1307	7	HTPLA		60	Flat		3.23	63.47	12.64
	1308	8	HTPLA		60	Flat		3.22	63.45	12.75
	1309	9	HTPLA		60	Flat		3.24	63.56	12.67
	1310	10	HTPLA		60	Flat		3.25	63.35	12.64
	1311	1	HTPLA		75	Flat		3.34	63.68	12.75
	1312	2	HTPLA		75	Flat		3.4	63.62	12.79
	1313	3	HTPLA		75	Flat		3.47	63.62	12.7
	1314	4	HTPLA		75	Flat		3.3	63.63	12.71
	1315	5	HTPLA		75	Flat		3.34	63.66	12.79
	1316	6	HTPLA		75	Flat		3.2	63.42	12.49
	1317	7	HTPLA		75	Flat		3.24	63.63	12.74
	1318	8	HTPLA		75	Flat		3.21	63.57	12.54
	1319	9	HTPLA		75	Flat		3.28	63.39	12.52
	1320	10	HTPLA		75	Flat		3.19	63.69	12.72
	1321	1	HTPLA		90	Flat		3.33	63.61	12.68
	1322	2	HTPLA		90	Flat		3.37	63.63	12.69
	1323	3	HTPLA		90	Flat		3.4	63.68	12.69
	1324	4	HTPLA		90	Flat		3.36	63.62	12.65
	1325	5	HTPLA		90	Flat		3.33	63.64	12.69
	1326	6	HTPLA		90	Flat		3.24	63.64	12.64
	1327	7	HTPLA		90	Flat		3.21	63.57	12.72
	1328	8	HTPLA		90	Flat		3.22	63.5	12.76
	1329	9	HTPLA		90	Flat		3.17	63.73	12.68
	1330	10	HTPLA		90	Flat		3.08	63.63	12.61
	1331	1	HTPLA		0	Horizontal		3.26	63.42	13
	1332	2	HTPLA		0	Horizontal		3.34	63.43	12.99
	1333	3	HTPLA		0	Horizontal		3.39	63.55	13.04
	1334	4	HTPLA		0	Horizontal		3.31	63.4	12.91
	1335	5	HTPLA		0	Horizontal		3.26	63.48	12.97
	1336	6	HTPLA		0	Horizontal		3.18	63.36	12.78
	1337	7	HTPLA		0	Horizontal		3.19	63.29	12.8
	1338	8	HTPLA		0	Horizontal		3.21	63.36	12.87
	1339	9	HTPLA		0	Horizontal		3.24	63.32	12.66
	1340	10	HTPLA		0	Horizontal		3.26	63.27	12.72
	1341	1	HTPLA		15	Horizontal		3.35	63.43	12.93
	1342	2	HTPLA		15	Horizontal		3.33	63.47	12.96
	1343	3	HTPLA		15	Horizontal		3.34	63.5	12.94
	1344	4	HTPLA		15	Horizontal		3.32	63.48	13
	1345	5	HTPLA		15	Horizontal		3.26	63.45	13
	1346	6	HTPLA		15	Horizontal		3.21	63.51	12.82
	1347	7	HTPLA		15	Horizontal		3.23	63.44	12.8
	1348	8	HTPLA		15	Horizontal		3.19	63.44	12.8
	1349	9	HTPLA		15	Horizontal		3.27	63.41	12.83
	1350	10	HTPLA		15	Horizontal		3.27	63.24	12.81
	1351	1	HTPLA		30	Horizontal		3.26	63.5	12.97
	1352	2	HTPLA		30	Horizontal		3.26	63.46	12.8
	1353	3	HTPLA		30	Horizontal		3.26	63.51	12.9
	1354	4	HTPLA		30	Horizontal		3.26	63.44	12.98
	1355	5	HTPLA		30	Horizontal		3.28	63.53	12.92
	1356	6	HTPLA		30	Horizontal		3.23	63.38	12.86
	1357	7	HTPLA		30	Horizontal		3.27	63.44	12.87
	1358	8	HTPLA		30	Horizontal		3.25	63.42	12.8
	1359	9	HTPLA		30	Horizontal		3.28	63.39	12.58
	1360	10	HTPLA		30	Horizontal		3.32	63.35	12.69
	1361	1	HTPLA		45	Horizontal		3.23	63.51	12.72
	1362	2	HTPLA		45	Horizontal		3.22	63.5	12.84
	1363	3	HTPLA		45	Horizontal		3.25	63.53	13.04
	1364	4	HTPLA		45	Horizontal		3.24	63.5	13
	1365	5	HTPLA		45	Horizontal		3.22	63.53	13
	1366	6	HTPLA		45	Horizontal		3.19	63.55	12.8
	1367	7	HTPLA		45	Horizontal		3.21	63.49	12.84
	1368	8	HTPLA		45	Horizontal		3.31	63.59	12.73
	1369	9	HTPLA		45	Horizontal		3.25	63.58	12.8
	1370	10	HTPLA		45	Horizontal		3.24	63.5	12.81
	1371	1	HTPLA		60	Horizontal		3.23	63.56	12.96
	1372	2	HTPLA		60	Horizontal		3.24	63.59	12.87
	1373	3	HTPLA		60	Horizontal		3.29	63.62	12.97
	1374	4	HTPLA		60	Horizontal		3.29	63.59	12.88
	1375	5	HTPLA		60	Horizontal		3.28	63.64	12.81
	1376	6	HTPLA		60	Horizontal		3.19	63.42	12.84
	1377	7	HTPLA		60	Horizontal		3.2	63.48	12.85
	1378	8	HTPLA		60	Horizontal		3.2	63.5	12.8
	1379	9	HTPLA		60	Horizontal		3.24	63.5	12.74
	1380	10	HTPLA		60	Horizontal		3.26	63.55	12.74
	1381	1	HTPLA		75	Horizontal		3.27	63.66	12.88
	1382	2	HTPLA		75	Horizontal		3.31	63.65	12.86
	1383	3	HTPLA		75	Horizontal		3.27	63.67	12.91
	1384	4	HTPLA		75	Horizontal		3.26	63.62	12.91
	1385	5	HTPLA		75	Horizontal		3.24	63.68	12.87
	1386	6	HTPLA		75	Horizontal		3.14	63.58	12.81
	1387	7	HTPLA		75	Horizontal		3.16	63.49	12.84
	1388	8	HTPLA		75	Horizontal		3.25	63.64	12.9
	1389	9	HTPLA		75	Horizontal		3.39	63.69	12.69
	1390	10	HTPLA		75	Horizontal		3.17	63.75	12.76
	1391	1	HTPLA		90	Horizontal		3.29	63.67	12.91
	1392	2	HTPLA		90	Horizontal		3.31	63.78	13.03
	1393	3	HTPLA		90	Horizontal		3.25	63.62	12.92
	1394	4	HTPLA		90	Horizontal		3.26	63.69	12.92
	1395	5	HTPLA		90	Horizontal		3.24	63.68	12.64
	1396	6	HTPLA		90	Horizontal		3.16	63.53	12.78
	1397	7	HTPLA		90	Horizontal		3.23	63.49	12.82
	1398	8	HTPLA		90	Horizontal		3.26	63.48	12.74
	1399	9	HTPLA		90	Horizontal		3.21	63.67	12.92
	1400	10	HTPLA		90	Horizontal		3.26	63.75	12.74
	1401	1	HTPLA		0	Vertical		3.37	63.9	12.72
	1402	2	HTPLA		0	Vertical		3.37	63.89	12.71
	1403	3	HTPLA		0	Vertical		3.34	63.96	12.69
	1404	4	HTPLA		0	Vertical		3.29	63.97	12.7
	1405	5	HTPLA		0	Vertical		3.27	63.68	12.77
	1406	6	HTPLA		0	Vertical		3.24	63.66	12.57
	1407	7	HTPLA		0	Vertical		3.19	63.65	12.77
	1408	8	HTPLA		0	Vertical		3.27	63.25	12.66
	1409	9	HTPLA		0	Vertical		3.22	63.36	12.66
	1410	10	HTPLA		0	Vertical		3.29	63.73	12.65
	1411	1	HTPLA		15	Vertical		3.28	63.7	12.71
	1412	2	HTPLA		15	Vertical		3.27	63.69	12.69
	1413	3	HTPLA		15	Vertical		3.27	63.98	12.65
	1414	4	HTPLA		15	Vertical		3.26	63.9	12.7
	1415	5	HTPLA		15	Vertical		3.28	63.64	12.7
	1416	6	HTPLA		15	Vertical		3.25	63.79	12.68
	1417	7	HTPLA		15	Vertical		3.22	63.82	12.72
	1418	8	HTPLA		15	Vertical		3.24	63.76	12.65
	1419	9	HTPLA		15	Vertical		3.21	63.63	12.6
	1420	10	HTPLA		15	Vertical		3.3	63.69	12.67
	1421	1	HTPLA		30	Vertical		3.27	63.94	12.72
	1422	2	HTPLA		30	Vertical		3.27	63.62	12.72
	1423	3	HTPLA		30	Vertical		3.26	63.9	12.72
	1424	4	HTPLA		30	Vertical		3.26	63.97	12.73
	1425	5	HTPLA		30	Vertical		3.27	64.21	12.7
	1426	6	HTPLA		30	Vertical		3.22	63.62	12.7
	1427	7	HTPLA		30	Vertical		3.25	63.63	12.7
	1428	8	HTPLA		30	Vertical		3.18	63.29	12.73
	1429	9	HTPLA		30	Vertical		3.21	63.6	12.67
	1430	10	HTPLA		30	Vertical		3.22	63.66	12.7
	1431	1	HTPLA		45	Vertical		3.26	63.68	12.77
	1432	2	HTPLA		45	Vertical		3.27	63.96	12.71
	1433	3	HTPLA		45	Vertical		3.25	63.97	12.68
	1434	4	HTPLA		45	Vertical		3.25	63.96	12.72
	1435	5	HTPLA		45	Vertical		3.25	63.9	12.71
	1436	6	HTPLA		45	Vertical		3.3	63.75	12.69
	1437	7	HTPLA		45	Vertical		3.26	63.66	12.71
	1438	8	HTPLA		45	Vertical		3.34	63.76	12.71
	1439	9	HTPLA		45	Vertical		3.2	63.86	12.85
	1440	10	HTPLA		45	Vertical		3.3	63.73	12.72
	1441	1	HTPLA		60	Vertical		3.27	63.98	12.72
	1442	2	HTPLA		60	Vertical		3.25	64	12.69
	1443	3	HTPLA		60	Vertical		3.26	63.77	12.69
	1444	4	HTPLA		60	Vertical		3.23	64.06	12.72
	1445	5	HTPLA		60	Vertical		3.26	63.96	12.75
	1446	6	HTPLA		60	Vertical		3.21	63.72	12.6
	1447	7	HTPLA		60	Vertical		3.18	63.51	12.6
	1448	8	HTPLA		60	Vertical		3.17	63.71	12.76
	1449	9	HTPLA		60	Vertical		3.27	63.53	12.7
	1450	10	HTPLA		60	Vertical		3.22	63.77	12.74
	1451	1	HTPLA		75	Vertical		3.24	63.94	12.72
	1452	2	HTPLA		75	Vertical		3.24	63.93	12.71
	1453	3	HTPLA		75	Vertical		3.26	63.74	12.71
	1454	4	HTPLA		75	Vertical		3.26	63.97	12.69
	1455	5	HTPLA		75	Vertical		3.25	63.96	12.67
	1456	6	HTPLA		75	Vertical		3.18	63.38	12.76
	1457	7	HTPLA		75	Vertical		3.23	63.39	12.72
	1458	8	HTPLA		75	Vertical		3.16	63.49	12.65
	1459	9	HTPLA		75	Vertical		3.15	63.63	12.63
	1460	10	HTPLA		75	Vertical		3.16	63.63	12.74
	1461	1	HTPLA		90	Vertical		3.26	63.84	12.74
	1462	2	HTPLA		90	Vertical		3.24	63.74	12.7
	1463	3	HTPLA		90	Vertical		3.26	63.57	12.69
	1464	4	HTPLA		90	Vertical		3.26	63.91	12.67
	1465	5	HTPLA		90	Vertical		3.24	64.04	12.72
	1466	6	HTPLA		90	Vertical		3.23	63.63	12.71
	1467	7	HTPLA		90	Vertical		3.22	63.76	12.7
	1468	8	HTPLA		90	Vertical		3.21	63.65	12.73
	1469	9	HTPLA		90	Vertical		3.23	63.62	12.71
	1470	10	HTPLA		90	Vertical		3.21	63.66	12.7
	1471	1	PC		0	Flat		3.12	63.56	12.77
	1472	2	PC		0	Flat		3.16	63.63	12.75
	1473	3	PC		0	Flat		3.15	63.47	12.76
	1474	4	PC		0	Flat		3.15	63.53	12.72
	1475	5	PC		0	Flat		3.19	63.47	12.68
	1476	6	PC		0	Flat		3.17	63.49	12.62
	1477	7	PC		0	Flat		3.14	63.51	12.67
	1478	8	PC		0	Flat		3.21	63.51	12.7
	1479	9	PC		0	Flat		3.3	63.33	12.77
	1480	10	PC		0	Flat		3.23	63.31	12.74
	1481	1	PC		15	Flat		3.21	63.48	12.79
	1482	2	PC		15	Flat		3.21	63.53	12.75
	1483	3	PC		15	Flat		3.24	63.49	12.72
	1484	4	PC		15	Flat		3.23	63.45	12.75
	1485	5	PC		15	Flat		3.21	63.52	12.76
	1486	6	PC		15	Flat		3.189	63.51	12.71
	1487	7	PC		15	Flat		3.24	63.48	12.73
	1488	8	PC		15	Flat		3.25	63.54	12.77
	1489	9	PC		15	Flat		3.22	63.43	12.65
	1490	10	PC		15	Flat		3.29	63.29	12.85
	1491	1	PC		30	Flat		3.19	63.68	12.74
	1492	2	PC		30	Flat		3.26	63.58	12.75
	1493	3	PC		30	Flat		3.24	63.59	12.81
	1494	4	PC		30	Flat		3.23	63.51	12.72
	1495	5	PC		30	Flat		3.27	63.67	12.71
	1496	6	PC		30	Flat		3.29	63.48	12.87
	1497	7	PC		30	Flat		3.2	63.57	12.72
	1498	8	PC		30	Flat		3.25	63.59	12.77
	1499	9	PC		30	Flat		3.27	63.31	12.78
	1500	10	PC		30	Flat		3.26	63.59	12.62
	1501	1	PC		45	Flat		3.24	63.48	12.71
	1502	2	PC		45	Flat		3.23	63.67	12.76
	1503	3	PC		45	Flat		3.24	63.51	12.7
	1504	4	PC		45	Flat		3.27	63.5	12.72
	1505	5	PC		45	Flat		3.24	63.53	12.78
	1506	6	PC		45	Flat		3.23	63.49	12.76
	1507	7	PC		45	Flat		3.27	63.54	12.76
	1508	8	PC		45	Flat		3.22	63.46	12.71
	1509	9	PC		45	Flat		3.33	63.32	12.64
	1510	10	PC		45	Flat		3.27	63.36	12.71
	1511	1	PC		60	Flat		3.26	63.47	12.71
	1512	2	PC		60	Flat		3.24	63.49	12.75
	1513	3	PC		60	Flat		3.21	63.52	12.73
	1514	4	PC		60	Flat		3.21	63.55	12.74
	1515	5	PC		60	Flat		3.21	63.54	12.72
	1516	6	PC		60	Flat		3.2	63.45	12.72
	1517	7	PC		60	Flat		3.19	63.47	12.67
	1518	8	PC		60	Flat		3.19	63.61	12.65
	1519	9	PC		60	Flat		3.28	63.21	12.74
	1520	10	PC		60	Flat		3.3	63.48	12.7
	1521	1	PC		75	Flat		3.2	63.52	12.74
	1522	2	PC		75	Flat		3.27	63.49	12.72
	1523	3	PC		75	Flat		3.22	63.51	12.8
	1524	4	PC		75	Flat		3.23	63.49	12.77
	1525	5	PC		75	Flat		3.26	63.52	12.74
	1526	6	PC		75	Flat		3.22	63.5	12.77
	1527	7	PC		75	Flat		3.21	63.48	12.72
	1528	8	PC		75	Flat		3.13	63.5	12.61
	1529	9	PC		75	Flat		3.29	63.38	12.7
	1530	10	PC		75	Flat		3.25	63.55	12.63
	1531	1	PC		90	Flat		3.26	63.52	12.78
	1532	2	PC		90	Flat		3.23	63.48	12.77
	1533	3	PC		90	Flat		3.24	63.52	12.81
	1534	4	PC		90	Flat		3.11	63.5	12.82
	1535	5	PC		90	Flat		3.25	63.5	12.73
	1536	6	PC		90	Flat		3.11	63.46	12.68
	1537	7	PC		90	Flat		3.03	63.53	12.75
	1538	8	PC		90	Flat		3.07	63.43	12.67
	1539	9	PC		90	Flat		3.29	63.31	12.76
	1540	10	PC		90	Flat		3.23	63.29	12.71
	1541	1	PC		0	Horizontal		3.25	63.49	12.71
	1542	2	PC		0	Horizontal		3.25	63.49	12.51
	1543	3	PC		0	Horizontal		3.26	63.49	12.52
	1544	4	PC		0	Horizontal		3.24	63.52	12.52
	1545	5	PC		0	Horizontal		3.25	63.52	12.53
	1546	6	PC		0	Horizontal		3.27	63.44	12.74
	1547	7	PC		0	Horizontal		3.23	63.53	12.65
	1548	8	PC		0	Horizontal		3.24	63.37	12.62
	1549	9	PC		0	Horizontal		3.23	63.46	12.77
	1550	10	PC		0	Horizontal		3.24	63.46	12.62
	1551	1	PC		15	Horizontal		3.27	63.55	12.53
	1552	2	PC		15	Horizontal		3.28	63.49	12.54
	1553	3	PC		15	Horizontal		3.26	63.52	12.49
	1554	4	PC		15	Horizontal		3.29	63.53	12.49
	1555	5	PC		15	Horizontal		3.26	63.5	12.5
	1556	6	PC		15	Horizontal		3.27	63.47	12.64
	1557	7	PC		15	Horizontal		3.19	63.41	12.63
	1558	8	PC		15	Horizontal		3.22	63.49	12.73
	1559	9	PC		15	Horizontal		3.26	63.5	12.68
	1560	10	PC		15	Horizontal		3.26	63.43	12.71
	1561	1	PC		30	Horizontal		3.28	63.52	12.54
	1562	2	PC		30	Horizontal		3.25	63.55	12.63
	1563	3	PC		30	Horizontal		3.29	63.48	12.73
	1564	4	PC		30	Horizontal		3.27	63.54	12.7
	1565	5	PC		30	Horizontal		3.29	63.59	12.67
	1566	6	PC		30	Horizontal		3.25	63.52	12.6
	1567	7	PC		30	Horizontal		3.24	63.47	12.69
	1568	8	PC		30	Horizontal		3.29	63.46	12.73
	1569	9	PC		30	Horizontal		3.39	63.5	12.77
	1570	10	PC		30	Horizontal		3.33	63.49	12.73
	1571	1	PC		45	Horizontal		3.26	63.58	12.71
	1572	2	PC		45	Horizontal		3.24	63.5	12.68
	1573	3	PC		45	Horizontal		3.27	63.57	12.71
	1574	4	PC		45	Horizontal		3.26	63.52	12.68
	1575	5	PC		45	Horizontal		3.24	63.5	12.72
	1576	6	PC		45	Horizontal		3.21	63.42	12.64
	1577	7	PC		45	Horizontal		3.3	63.5	12.67
	1578	8	PC		45	Horizontal		3.26	63.5	12.81
	1579	9	PC		45	Horizontal		3.25	63.54	12.6
	1580	10	PC		45	Horizontal		3.24	63.47	12.72
	1581	1	PC		60	Horizontal		3.27	63.52	12.66
	1582	2	PC		60	Horizontal		3.27	63.52	12.7
	1583	3	PC		60	Horizontal		3.27	63.42	12.66
	1584	4	PC		60	Horizontal		3.27	63.55	12.71
	1585	5	PC		60	Horizontal		3.28	63.52	12.71
	1586	6	PC		60	Horizontal		3.23	63.47	12.66
	1587	7	PC		60	Horizontal		3.28	63.23	12.76
	1588	8	PC		60	Horizontal		3.26	63.49	12.72
	1589	9	PC		60	Horizontal		3.19	63.4	12.75
	1590	10	PC		60	Horizontal		3.23	63.44	12.79
	1591	1	PC		75	Horizontal		3.26	63.44	12.65
	1592	2	PC		75	Horizontal		3.27	63.4	12.67
	1593	3	PC		75	Horizontal		3.25	63.52	12.66
	1594	4	PC		75	Horizontal		3.24	63.42	12.67
	1595	5	PC		75	Horizontal		3.25	63.58	12.7
	1596	6	PC		75	Horizontal		3.21	63.48	12.72
	1597	7	PC		75	Horizontal		3.25	63.4	12.79
	1598	8	PC		75	Horizontal		3.28	63.51	12.77
	1599	9	PC		75	Horizontal		3.29	63.39	12.64
	1600	10	PC		75	Horizontal		3.22	63.33	12.69
	1601	1	PC		90	Horizontal		3.25	63.52	12.67
	1602	2	PC		90	Horizontal		3.27	63.51	12.72
	1603	3	PC		90	Horizontal		3.25	63.59	12.5
	1604	4	PC		90	Horizontal		3.26	63.48	12.53
	1605	5	PC		90	Horizontal		3.27	63.53	12.53
	1606	6	PC		90	Horizontal		3.29	63.38	12.68
	1607	7	PC		90	Horizontal		3.28	63.35	12.66
	1608	8	PC		90	Horizontal		3.22	63.44	12.71
	1609	9	PC		90	Horizontal		3.32	63.38	12.73
	1610	10	PC		90	Horizontal		3.26	63.45	12.73
	1611	1	PC		0	Vertical		3.25	63.47	12.72
	1612	2	PC		0	Vertical		3.25	63.4	12.72
	1613	3	PC		0	Vertical		3.24	63.54	12.73
	1614	4	PC		0	Vertical		3.24	63.56	12.72
	1615	5	PC		0	Vertical		3.25	63.37	12.72
	1616	6	PC		0	Vertical		3.28	63.41	12.74
	1617	7	PC		0	Vertical		3.21	63.34	12.72
	1618	8	PC		0	Vertical		3.26	63.33	12.75
	1619	9	PC		0	Vertical		3.24	63.55	12.78
	1620	10	PC		0	Vertical		3.33	63.35	12.73
	1621	1	PC		15	Vertical		3.25	63.37	12.71
	1622	2	PC		15	Vertical		3.26	63.42	12.72
	1623	3	PC		15	Vertical		3.26	63.54	12.7
	1624	4	PC		15	Vertical		3.24	63.38	12.71
	1625	5	PC		15	Vertical		3.26	63.36	12.72
	1626	6	PC		15	Vertical		3.25	63.37	12.74
	1627	7	PC		15	Vertical		3.25	63.38	12.75
	1628	8	PC		15	Vertical		3.25	63.32	12.75
	1629	9	PC		15	Vertical		3.31	63.48	12.78
	1630	10	PC		15	Vertical		3.27	63.5	12.75
	1631	1	PC		30	Vertical		3.28	63.34	12.78
	1632	2	PC		30	Vertical		3.24	63.45	12.71
	1633	3	PC		30	Vertical		3.26	63.43	12.71
	1634	4	PC		30	Vertical		3.25	63.44	12.69
	1635	5	PC		30	Vertical		3.25	63.41	12.72
	1636	6	PC		30	Vertical		3.25	63.38	12.71
	1637	7	PC		30	Vertical		3.24	63.34	12.74
	1638	8	PC		30	Vertical		3.27	63.36	12.79
	1639	9	PC		30	Vertical		3.26	63.37	12.73
	1640	10	PC		30	Vertical		3.27	63.46	12.8
	1641	1	PC		45	Vertical		3.25	63.45	12.73
	1642	2	PC		45	Vertical		3.24	63.45	12.7
	1643	3	PC		45	Vertical		3.25	63.44	12.73
	1644	4	PC		45	Vertical		3.21	63.36	12.73
	1645	5	PC		45	Vertical		3.25	63.32	12.74
	1646	6	PC		45	Vertical		3.32	63.3	12.8
	1647	7	PC		45	Vertical		3.32	63.34	12.82
	1648	8	PC		45	Vertical		3.28	63.49	12.77
	1649	9	PC		45	Vertical		3.27	63.54	12.85
	1650	10	PC		45	Vertical		3.25	63.52	12.74
	1651	1	PC		60	Vertical		3.27	63.33	12.77
	1652	2	PC		60	Vertical		3.26	63.41	12.71
	1653	3	PC		60	Vertical		3.28	63.44	12.74
	1654	4	PC		60	Vertical		3.26	63.44	12.72
	1655	5	PC		60	Vertical		3.25	63.43	12.77
	1656	6	PC		60	Vertical		3.29	63.37	12.79
	1657	7	PC		60	Vertical		3.31	63.32	12.84
	1658	8	PC		60	Vertical		3.26	63.46	12.82
	1659	9	PC		60	Vertical		3.22	63.42	12.75
	1660	10	PC		60	Vertical		3.26	63.48	12.75
	1661	1	PC		75	Vertical		3.26	63.48	12.71
	1662	2	PC		75	Vertical		3.27	63.3	12.74
	1663	3	PC		75	Vertical		3.26	63.36	12.72
	1664	4	PC		75	Vertical		3.26	63.33	12.77
	1665	5	PC		75	Vertical		3.26	63.47	12.7
	1666	6	PC		75	Vertical		3.24	63.25	12.81
	1667	7	PC		75	Vertical		3.26	63.27	12.74
	1668	8	PC		75	Vertical		3.35	63.27	12.79
	1669	9	PC		75	Vertical		3.29	63.41	12.73
	1670	10	PC		75	Vertical		3.34	63.54	12.81
	1671	1	PC		90	Vertical		3.28	63.3	12.75
	1672	2	PC		90	Vertical		3.26	63.4	12.71
	1673	3	PC		90	Vertical		3.26	63.34	12.74
	1674	4	PC		90	Vertical		3.27	63.3	12.71
	1675	5	PC		90	Vertical		3.26	63.46	12.71
	1676	6	PC		90	Vertical		3.24	63.35	12.78
	1677	7	PC		90	Vertical		3.25	63.3	12.77
	1678	8	PC		90	Vertical		3.26	63.27	12.78
	1679	9	PC		90	Vertical		3.3	63.49	12.77
	1680	10	PC		90	Vertical		3.3	63.52	12.75
	1681	1	PETG		0	Flat		3.25	63.53	12.67
	1682	2	PETG		0	Flat		3.24	63.5	12.66
	1683	3	PETG		0	Flat		3.25	63.52	12.73
	1684	4	PETG		0	Flat		3.23	63.5	12.69
	1685	5	PETG		0	Flat		3.26	63.52	12.68
	1686	6	PETG		0	Flat		3.07	63.51	12.7
	1687	7	PETG		0	Flat		3.11	63.56	12.66
	1688	8	PETG		0	Flat		3.28	63.41	12.77
	1689	9	PETG		0	Flat		3.16	63.15	12.77
	1690	10	PETG		0	Flat		3.26	63.27	12.63
	1691	1	PETG		15	Flat		3.27	63.53	12.72
	1692	2	PETG		15	Flat		3.25	63.52	12.72
	1693	3	PETG		15	Flat		3.27	63.5	12.71
	1694	4	PETG		15	Flat		3.28	63.5	12.68
	1695	5	PETG		15	Flat		3.26	63.52	12.73
	1696	6	PETG		15	Flat		3.13	63.44	12.73
	1697	7	PETG		15	Flat		3.15	63.51	12.81
	1698	8	PETG		15	Flat		3.22	63.46	12.62
	1699	9	PETG		15	Flat		3.17	63.52	12.74
	1700	10	PETG		15	Flat		3.12	63.41	12.69
	1701	1	PETG		30	Flat		3.24	63.52	12.7
	1702	2	PETG		30	Flat		3.26	63.5	12.69
	1703	3	PETG		30	Flat		3.29	63.37	12.7
	1704	4	PETG		30	Flat		3.27	63.36	12.68
	1705	5	PETG		30	Flat		3.24	63.45	12.73
	1706	6	PETG		30	Flat		3.25	63.39	12.7
	1707	7	PETG		30	Flat		3.25	63.32	12.72
	1708	8	PETG		30	Flat		3.25	63.28	12.66
	1709	9	PETG		30	Flat		3.23	63.76	12.63
	1710	10	PETG		30	Flat		3.28	63.52	12.84
	1711	1	PETG		45	Flat		3.27	63.24	12.7
	1712	2	PETG		45	Flat		3.25	63.3	12.69
	1713	3	PETG		45	Flat		3.25	63.35	12.69
	1714	4	PETG		45	Flat		3.24	63.47	12.7
	1715	5	PETG		45	Flat		3.27	63.36	12.68
	1716	6	PETG		45	Flat		3.29	63.32	12.7
	1717	7	PETG		45	Flat		3.29	63.48	12.61
	1718	8	PETG		45	Flat		3.22	63.53	12.55
	1719	9	PETG		45	Flat		3.18	63.54	12.64
	1720	10	PETG		45	Flat		3.16	63.51	12.55
	1721	1	PETG		60	Flat		3.25	63.28	12.72
	1722	2	PETG		60	Flat		3.27	63.22	12.72
	1723	3	PETG		60	Flat		3.24	63.29	12.71
	1724	4	PETG		60	Flat		3.26	63.42	12.7
	1725	5	PETG		60	Flat		3.28	63.18	12.74
	1726	6	PETG		60	Flat		3.28	63.29	12.67
	1727	7	PETG		60	Flat		3.26	63.24	12.65
	1728	8	PETG		60	Flat		3.34	63.12	12.67
	1729	9	PETG		60	Flat		3.22	63.52	12.64
	1730	10	PETG		60	Flat		3.27	63.32	12.62
	1731	1	PETG		75	Flat		3.27	63.14	12.73
	1732	2	PETG		75	Flat		3.24	63.28	12.75
	1733	3	PETG		75	Flat		3.25	63.24	12.72
	1734	4	PETG		75	Flat		3.28	63.2	12.71
	1735	5	PETG		75	Flat		3.26	63.26	12.71
	1736	6	PETG		75	Flat		3.31	63.15	12.76
	1737	7	PETG		75	Flat		3.24	63.11	12.73
	1738	8	PETG		75	Flat		3.24	63.11	12.79
	1739	9	PETG		75	Flat		3.22	63.58	12.49
	1740	10	PETG		75	Flat		3.21	63.39	12.72
	1741	1	PETG		90	Flat		3.24	63.14	12.7
	1742	2	PETG		90	Flat		3.27	63.23	12.72
	1743	3	PETG		90	Flat		3.27	63.13	12.76
	1744	4	PETG		90	Flat		3.25	63.13	12.68
	1745	5	PETG		90	Flat		3.26	63.03	12.7
	1746	6	PETG		90	Flat		3.28	63.07	12.72
	1747	7	PETG		90	Flat		3.25	63.21	12.67
	1748	8	PETG		90	Flat		3.31	63.05	12.64
	1749	9	PETG		90	Flat		3.41	63.64	12.64
	1750	10	PETG		90	Flat		3.21	63.6	12.65
	1751	1	PETG		0	Horizontal		3.26	63.51	12.77
	1752	2	PETG		0	Horizontal		3.23	63.5	12.78
	1753	3	PETG		0	Horizontal		3.27	63.54	12.76
	1754	4	PETG		0	Horizontal		3.26	63.54	12.77
	1755	5	PETG		0	Horizontal		3.26	63.58	12.8
	1756	6	PETG		0	Horizontal		3.2	63.48	12.74
	1757	7	PETG		0	Horizontal		3.18	63.64	12.77
	1758	8	PETG		0	Horizontal		3.28	63.35	12.77
	1759	9	PETG		0	Horizontal		3.26	63.48	12.72
	1760	10	PETG		0	Horizontal		3.25	63.42	12.68
	1761	1	PETG		15	Horizontal		3.26	63.48	12.67
	1762	2	PETG		15	Horizontal		3.27	63.51	12.69
	1763	3	PETG		15	Horizontal		3.26	63.58	12.69
	1764	4	PETG		15	Horizontal		3.24	63.54	12.7
	1765	5	PETG		15	Horizontal		3.27	63.49	12.72
	1766	6	PETG		15	Horizontal		3.15	63.6	12.75
	1767	7	PETG		15	Horizontal		3.18	63.57	12.74
	1768	8	PETG		15	Horizontal		3.26	63.52	12.71
	1769	9	PETG		15	Horizontal		3.28	63.54	12.71
	1770	10	PETG		15	Horizontal		3.24	63.33	12.54
	1771	1	PETG		30	Horizontal		3.27	63.6	12.77
	1772	2	PETG		30	Horizontal		3.26	63.51	12.68
	1773	3	PETG		30	Horizontal		3.26	63.57	12.75
	1774	4	PETG		30	Horizontal		3.24	63.48	12.81
	1775	5	PETG		30	Horizontal		3.25	63.54	12.79
	1776	6	PETG		30	Horizontal		3.16	63.61	12.65
	1777	7	PETG		30	Horizontal		3.16	63.66	12.8
	1778	8	PETG		30	Horizontal		3.23	63.45	12.75
	1779	9	PETG		30	Horizontal		3.25	63.53	12.66
	1780	10	PETG		30	Horizontal		3.27	63.34	12.67
	1781	1	PETG		45	Horizontal		3.25	63.47	12.72
	1782	2	PETG		45	Horizontal		3.25	63.51	12.84
	1783	3	PETG		45	Horizontal		3.24	63.5	12.71
	1784	4	PETG		45	Horizontal		3.25	63.46	12.7
	1785	5	PETG		45	Horizontal		3.24	63.49	12.67
	1786	6	PETG		45	Horizontal		3.23	63.47	12.76
	1787	7	PETG		45	Horizontal		3.18	63.43	12.69
	1788	8	PETG		45	Horizontal		3.19	63.48	12.75
	1789	9	PETG		45	Horizontal		3.25	63.61	12.49
	1790	10	PETG		45	Horizontal		3.19	63.49	12.63
	1791	1	PETG		60	Horizontal		3.25	63.5	12.71
	1792	2	PETG		60	Horizontal		3.25	63.45	12.71
	1793	3	PETG		60	Horizontal		3.27	63.36	12.73
	1794	4	PETG		60	Horizontal		3.25	63.42	12.72
	1795	5	PETG		60	Horizontal		3.25	63.38	12.73
	1796	6	PETG		60	Horizontal		3.23	63.45	12.78
	1797	7	PETG		60	Horizontal		3.26	63.34	12.79
	1798	8	PETG		60	Horizontal		3.25	63.36	12.8
	1799	9	PETG		60	Horizontal		3.16	63.7	12.65
	1800	10	PETG		60	Horizontal		3.21	63.35	12.69
	1801	1	PETG		75	Horizontal		3.26	63.33	12.7
	1802	2	PETG		75	Horizontal		3.24	63.37	12.79
	1803	3	PETG		75	Horizontal		3.25	63.41	12.82
	1804	4	PETG		75	Horizontal		3.26	63.34	12.72
	1805	5	PETG		75	Horizontal		3.25	63.4	12.76
	1806	6	PETG		75	Horizontal		3.22	63.33	12.57
	1807	7	PETG		75	Horizontal		3.22	63.35	12.76
	1808	8	PETG		75	Horizontal		3.22	63.3	12.87
	1809	9	PETG		75	Horizontal		3.2	63.81	12.67
	1810	10	PETG		75	Horizontal		3.15	63.71	12.65
	1811	1	PETG		90	Horizontal		3.25	63.3	12.74
	1812	2	PETG		90	Horizontal		3.25	63.43	12.72
	1813	3	PETG		90	Horizontal		3.23	63.43	12.74
	1814	4	PETG		90	Horizontal		3.24	63.37	12.69
	1815	5	PETG		90	Horizontal		3.25	63.41	12.74
	1816	6	PETG		90	Horizontal		3.2	63.33	12.68
	1817	7	PETG		90	Horizontal		3.23	63.39	12.68
	1818	8	PETG		90	Horizontal		3.2	63.34	12.66
	1819	9	PETG		90	Horizontal		3.2	63.71	12.7
	1820	10	PETG		90	Horizontal		3.27	63.8	12.66
	1821	1	PETG		0	Vertical		3.25	63.79	12.7
	1822	2	PETG		0	Vertical		3.24	63.71	12.7
	1823	3	PETG		0	Vertical		3.23	63.8	12.68
	1824	4	PETG		0	Vertical		3.23	63.87	12.7
	1825	5	PETG		0	Vertical		3.21	63.81	12.7
	1826	6	PETG		0	Vertical		3.19	63.92	12.63
	1827	7	PETG		0	Vertical		3.23	63.75	12.76
	1828	8	PETG		0	Vertical		3.25	63.75	12.76
	1829	9	PETG		0	Vertical		3.27	63.68	12.77
	1830	10	PETG		0	Vertical		3.3	63.58	12.57
	1831	1	PETG		15	Vertical		3.23	63.83	12.72
	1832	2	PETG		15	Vertical		3.21	63.85	12.71
	1833	3	PETG		15	Vertical		3.24	63.82	12.74
	1834	4	PETG		15	Vertical		3.21	63.93	12.76
	1835	5	PETG		15	Vertical		3.23	63.84	12.67
	1836	6	PETG		15	Vertical		3.22	63.83	12.72
	1837	7	PETG		15	Vertical		3.25	63.66	12.7
	1838	8	PETG		15	Vertical		3.21	63.54	12.74
	1839	9	PETG		15	Vertical		3.25	63.74	12.55
	1840	10	PETG		15	Vertical		3.26	63.59	12.68
	1841	1	PETG		30	Vertical		3.19	63.87	12.7
	1842	2	PETG		30	Vertical		3.19	63.98	12.72
	1843	3	PETG		30	Vertical		3.2	63.88	12.66
	1844	4	PETG		30	Vertical		3.18	63.72	12.67
	1845	5	PETG		30	Vertical		3.16	63.81	12.64
	1846	6	PETG		30	Vertical		3.19	63.86	12.82
	1847	7	PETG		30	Vertical		3.27	63.74	12.72
	1848	8	PETG		30	Vertical		3.18	63.93	12.67
	1849	9	PETG		30	Vertical		3.27	63.7	12.66
	1850	10	PETG		30	Vertical		3.27	63.53	12.56
	1851	1	PETG		45	Vertical		3.17	63.9	12.67
	1852	2	PETG		45	Vertical		3.19	63.96	12.65
	1853	3	PETG		45	Vertical		3.21	63.95	12.66
	1854	4	PETG		45	Vertical		3.17	63.85	12.77
	1855	5	PETG		45	Vertical		3.18	63.81	12.72
	1856	6	PETG		45	Vertical		3.22	63.84	12.69
	1857	7	PETG		45	Vertical		3.17	63.95	12.67
	1858	8	PETG		45	Vertical		3.26	63.61	12.67
	1859	9	PETG		45	Vertical		3.25	63.67	12.63
	1860	10	PETG		45	Vertical		3.24	63.58	12.59
	1861	1	PETG		60	Vertical		3.19	64.03	12.72
	1862	2	PETG		60	Vertical		3.16	63.8	12.68
	1863	3	PETG		60	Vertical		3.19	64.06	12.71
	1864	4	PETG		60	Vertical		3.19	63.83	12.67
	1865	5	PETG		60	Vertical		3.21	63.85	12.69
	1866	6	PETG		60	Vertical		3.21	63.91	12.67
	1867	7	PETG		60	Vertical		3.24	63.67	12.72
	1868	8	PETG		60	Vertical		3.22	63.71	12.76
	1869	9	PETG		60	Vertical		3.22	63.58	12.6
	1870	10	PETG		60	Vertical		3.19	63.64	12.72
	1871	1	PETG		75	Vertical		3.19	63.87	12.7
	1872	2	PETG		75	Vertical		3.18	63.8	12.71
	1873	3	PETG		75	Vertical		3.17	63.79	12.71
	1874	4	PETG		75	Vertical		3.15	63.93	12.7
	1875	5	PETG		75	Vertical		3.24	63.66	12.73
	1876	6	PETG		75	Vertical		3.22	63.86	12.65
	1877	7	PETG		75	Vertical		3.24	63.81	12.7
	1878	8	PETG		75	Vertical		3.23	63.68	12.68
	1879	9	PETG		75	Vertical		3.3	63.73	12.76
	1880	10	PETG		75	Vertical		3.28	63.74	12.75
	1881	1	PETG		90	Vertical		3.19	63.85	12.69
	1882	2	PETG		90	Vertical		3.18	63.82	12.72
	1883	3	PETG		90	Vertical		3.16	63.74	12.77
	1884	4	PETG		90	Vertical		3.16	63.79	12.72
	1885	5	PETG		90	Vertical		3.19	63.86	12.7
	1886	6	PETG		90	Vertical		3.25	63.85	12.7
	1887	7	PETG		90	Vertical		3.2	63.9	12.66
	1888	8	PETG		90	Vertical		3.21	63.86	12.64
	1889	9	PETG		90	Vertical		3.31	63.74	12.67
	1890	10	PETG		90	Vertical		3.3	63.74	12.91
	1891	1	WPLA		0	Flat		3.33	63.52	12.83
	1892	2	WPLA		0	Flat		3.37	63.55	12.82
	1893	3	WPLA		0	Flat		3.27	63.53	12.83
	1894	4	WPLA		0	Flat		3.32	63.52	12.8
	1895	5	WPLA		0	Flat		3.28	63.52	12.79
	1896	6	WPLA		0	Flat		3.28	63.54	12.8
	1897	7	WPLA		0	Flat		3.24	63.52	12.74
	1898	8	WPLA		0	Flat		3.28	63.5	12.77
	1899	9	WPLA		0	Flat		3.23	63.51	12.91
	1900	10	WPLA		0	Flat		3.26	63.58	12.88
	1901	1	WPLA		15	Flat		3.27	63.53	12.83
	1902	2	WPLA		15	Flat		3.27	63.5	12.8
	1903	3	WPLA		15	Flat		3.29	63.47	12.81
	1904	4	WPLA		15	Flat		3.28	63.55	12.86
	1905	5	WPLA		15	Flat		3.28	63.51	12.78
	1906	6	WPLA		15	Flat		3.28	63.33	12.6
	1907	7	WPLA		15	Flat		3.25	63.35	12.61
	1908	8	WPLA		15	Flat		3.26	63.41	12.65
	1909	9	WPLA		15	Flat		3.19	63.49	12.89
	1910	10	WPLA		15	Flat		3.25	63.65	12.85
	1911	1	WPLA		30	Flat		3.26	63.67	12.84
	1912	2	WPLA		30	Flat		3.27	63.6	12.86
	1913	3	WPLA		30	Flat		3.29	63.58	12.83
	1914	4	WPLA		30	Flat		3.28	63.59	12.68
	1915	5	WPLA		30	Flat		3.29	63.59	12.86
	1916	6	WPLA		30	Flat		3.27	63.69	12.73
	1917	7	WPLA		30	Flat		3.26	63.63	12.73
	1918	8	WPLA		30	Flat		3.23	63.68	12.74
	1919	9	WPLA		30	Flat		3.2	63.65	12.79
	1920	10	WPLA		30	Flat		3.27	63.52	12.82
	1921	1	WPLA		45	Flat		3.29	63.57	12.7
	1922	2	WPLA		45	Flat		3.29	63.51	12.7
	1923	3	WPLA		45	Flat		3.28	63.58	12.7
	1924	4	WPLA		45	Flat		3.28	63.48	12.71
	1925	5	WPLA		45	Flat		3.28	63.62	12.73
	1926	6	WPLA		45	Flat		3.25	63.62	12.71
	1927	7	WPLA		45	Flat		3.26	63.42	12.69
	1928	8	WPLA		45	Flat		3.19	63.55	12.79
	1929	9	WPLA		45	Flat		3.15	63.5	12.82
	1930	10	WPLA		45	Flat		3.24	63.63	12.72
	1931	1	WPLA		60	Flat		3.31	63.54	12.78
	1932	2	WPLA		60	Flat		3.34	63.67	12.7
	1933	3	WPLA		60	Flat		3.31	63.64	12.77
	1934	4	WPLA		60	Flat		3.27	63.64	12.79
	1935	5	WPLA		60	Flat		3.31	63.66	12.78
	1936	6	WPLA		60	Flat		3.25	63.54	12.64
	1937	7	WPLA		60	Flat		3.26	63.66	12.68
	1938	8	WPLA		60	Flat		3.26	63.63	12.7
	1939	9	WPLA		60	Flat		3.27	63.68	12.75
	1940	10	WPLA		60	Flat		3.25	63.75	12.8
	1941	1	WPLA		75	Flat		3.31	63.64	12.74
	1942	2	WPLA		75	Flat		3.34	63.71	12.74
	1943	3	WPLA		75	Flat		3.26	63.81	12.74
	1944	4	WPLA		75	Flat		3.29	63.83	12.71
	1945	5	WPLA		75	Flat		3.27	63.8	12.71
	1946	6	WPLA		75	Flat		3.27	63.82	12.75
	1947	7	WPLA		75	Flat		3.22	63.81	12.82
	1948	8	WPLA		75	Flat		3.25	63.82	12.7
	1949	9	WPLA		75	Flat		3.22	63.69	12.75
	1950	10	WPLA		75	Flat		3.29	63.73	12.62
	1951	1	WPLA		90	Flat		3.28	63.71	12.73
	1952	2	WPLA		90	Flat		3.31	63.86	12.66
	1953	3	WPLA		90	Flat		3.28	63.78	12.71
	1954	4	WPLA		90	Flat		3.34	63.78	12.75
	1955	5	WPLA		90	Flat		3.27	63.76	12.73
	1956	6	WPLA		90	Flat		3.28	63.83	12.73
	1957	7	WPLA		90	Flat		3.33	63.85	12.68
	1958	8	WPLA		90	Flat		3.25	63.87	12.7
	1959	9	WPLA		90	Flat		3.28	63.75	12.76
	1960	10	WPLA		90	Flat		3.18	63.87	12.72
	1961	1	WPLA		0	Horizontal		3.25	63.5	12.7
	1962	2	WPLA		0	Horizontal		3.35	63.6	12.8
	1963	3	WPLA		0	Horizontal		3.33	63.58	12.69
	1964	4	WPLA		0	Horizontal		3.36	63.46	12.59
	1965	5	WPLA		0	Horizontal		3.24	63.23	12.68
	1966	6	WPLA		0	Horizontal		3.31	63.26	12.82
	1967	7	WPLA		0	Horizontal		3.27	63.25	12.69
	1968	8	WPLA		0	Horizontal		3.26	63.2	12.64
	1969	9	WPLA		0	Horizontal		3.3	63.39	12.68
	1970	10	WPLA		0	Horizontal		3.28	63.16	12.72
	1971	1	WPLA		15	Horizontal		3.25	63.5	12.7
	1972	2	WPLA		15	Horizontal		3.35	63.6	12.8
	1973	3	WPLA		15	Horizontal		3.37	63.61	12.61
	1974	4	WPLA		15	Horizontal		3.33	63.42	12.68
	1975	5	WPLA		15	Horizontal		3.38	63.8	12.79
	1976	6	WPLA		15	Horizontal		3.41	63.42	12.58
	1977	7	WPLA		15	Horizontal		3.35	63.53	12.72
	1978	8	WPLA		15	Horizontal		3.36	63.32	12.71
	1979	9	WPLA		15	Horizontal		3.4	63.44	12.68
	1980	10	WPLA		15	Horizontal		3.38	63.42	12.71
	1981	1	WPLA		30	Horizontal		3.25	63.5	12.7
	1982	2	WPLA		30	Horizontal		3.35	63.6	12.8
	1983	3	WPLA		30	Horizontal		3.28	63.66	12.75
	1984	4	WPLA		30	Horizontal		3.31	63.63	12.72
	1985	5	WPLA		30	Horizontal		3.26	63.53	12.77
	1986	6	WPLA		30	Horizontal		3.31	63.44	12.59
	1987	7	WPLA		30	Horizontal		3.33	63.49	12.64
	1988	8	WPLA		30	Horizontal		3.28	63.46	12.81
	1989	9	WPLA		30	Horizontal		3.27	63.56	12.77
	1990	10	WPLA		30	Horizontal		3.31	63.44	12.55
	1991	1	WPLA		45	Horizontal		3.25	63.5	12.7
	1992	2	WPLA		45	Horizontal		3.35	63.6	12.8
	1993	3	WPLA		45	Horizontal		3.28	63.57	12.77
	1994	4	WPLA		45	Horizontal		3.26	63.67	12.69
[truncated: 316 more rows]
